# Supplementary material for: Resolving a QTL complex for height, heading, and grain yield on chromosome 3A in bread wheat
Source: PubMed Central journal article supplement (PMC8023219; doi:10.1093/jxb/erab058), 2021-02-12
Supplement: erab058_suppl_supplementary-figures-s1-s2_table-s1-s2.pdf [file erab058_suppl_supplementary-figures-s1-s2_table-s1-s2.pdf]

# Resolving a QTL complex for height, heading, and grain yield on chromosome 3A in bread wheat

Alba Farre Martinez, Clare Lister, Sue Freeman, Jun Ma, Simon Berry, Luzie Wingen, Simon Griffiths

## Supplementary Fig 1

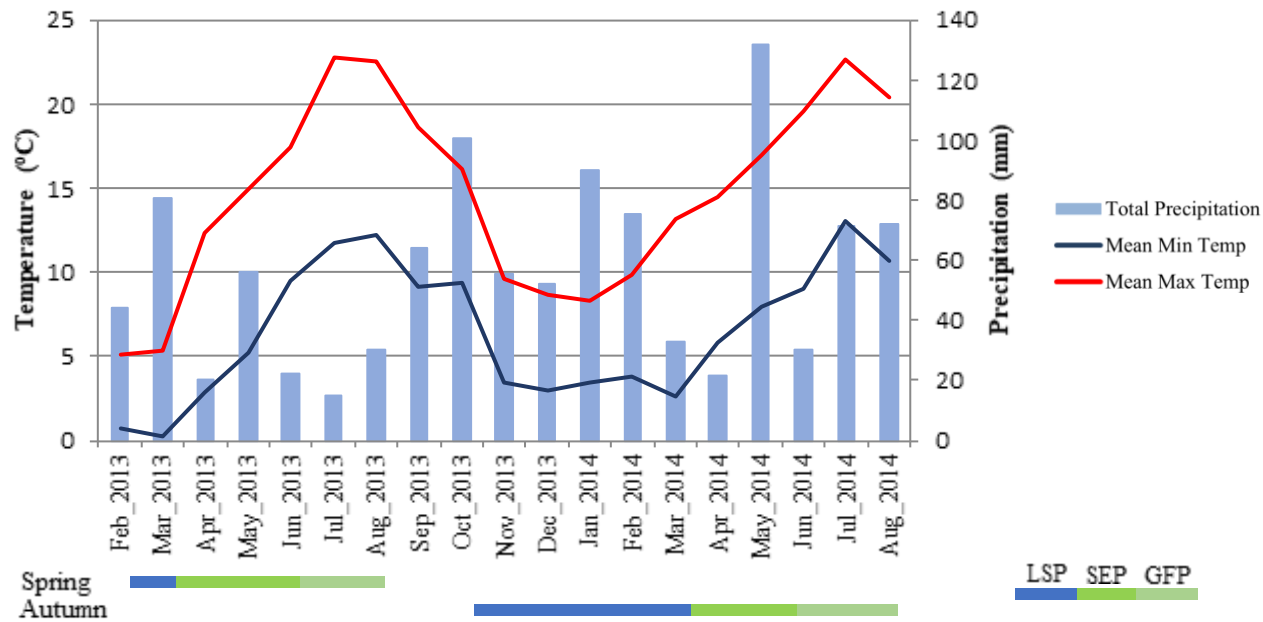

**Supplementary Fig 1.** Means of minimum (blue line) and maximum (red line) temperatures and cumulated rainfall (blue bars) during the months of the growth cycle of the spring and autumn sown trials (LSP = period from seedling emergence to first node detectable, SEP = period from first node detectable to anthesis and GFP = period from anthesis to physiological maturity).

## Supplementary Fig 2

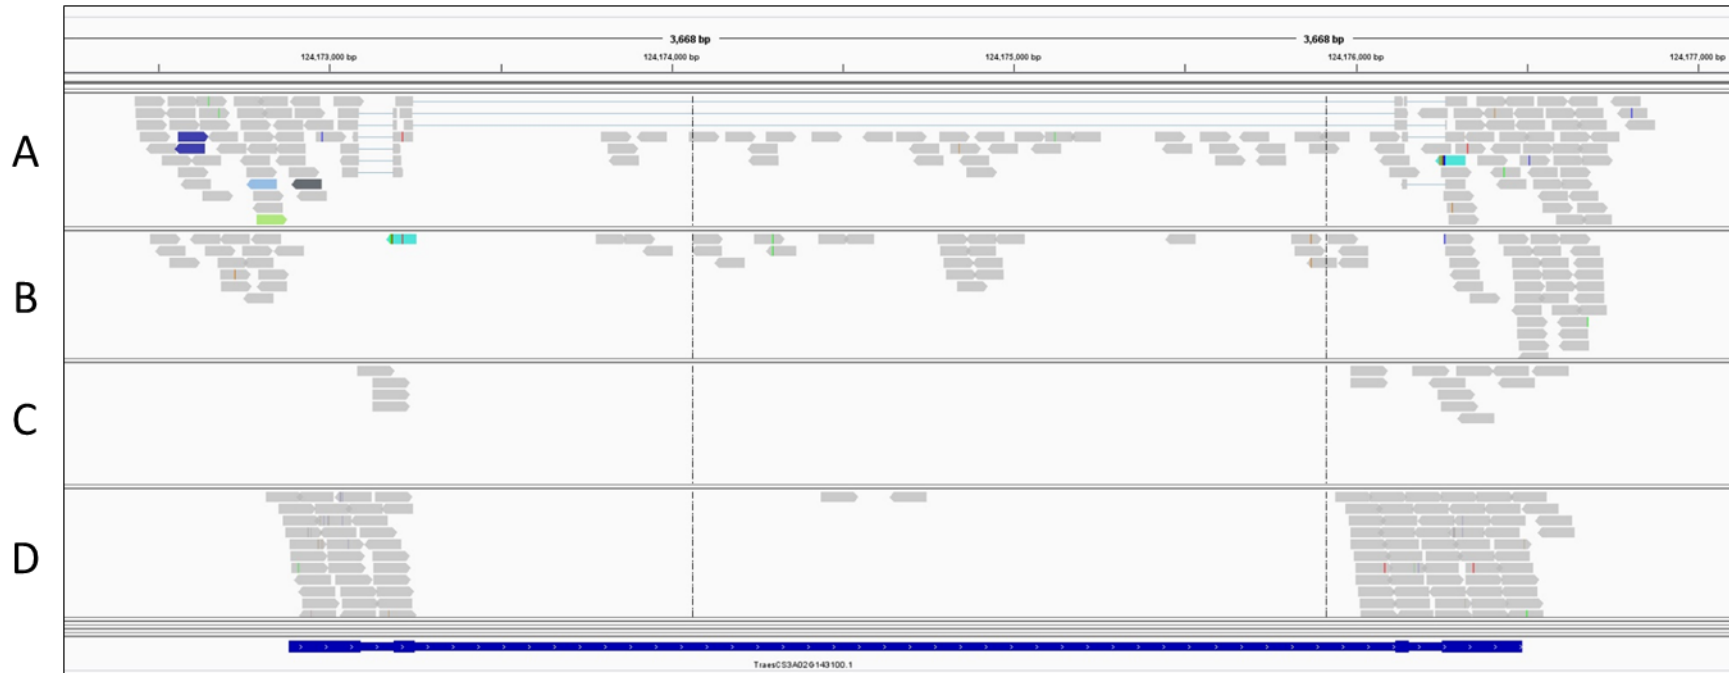

### Supplementary Fig. 2

Screenshot from IGV showing expression of *FT2* = TraesCS3A02G143000

- A. RNAseq data from the Early/Short pools, equivalent to Avalon
- B. RNAseq data from the Late/Tall pools, equivalent to Cadenza
- C. Exome capture data from Avalon
- D. Exome capture data from Cadenza

## Supplementary Table 1

| Gene ID            | Start    | QTL Region | Mapping Marker | log2 FoldChange | Gene                                   |
|--------------------|----------|------------|----------------|-----------------|----------------------------------------|
| TraesCS3A02G072900 | 45083541 |            |                | -0.09           |                                        |
| TraesCS3A02G073000 | 45124474 |            |                | 0.30            |                                        |
| TraesCS3A02G073100 | 45170467 |            |                | 0.00            |                                        |
| TraesCS3A02G073200 | 45564043 |            |                | 0.50            |                                        |
| TraesCS3A02G073300 | 45569687 |            |                | -0.22           |                                        |
| TraesCS3A02G073400 | 45592602 |            |                | -0.20           |                                        |
| TraesCS3A02G073500 | 45776166 |            |                | 0.00            |                                        |
| TraesCS3A02G073600 | 45931648 |            |                | -1.27           |                                        |
| TraesCS3A02G073700 | 46006549 |            |                | 0.04            |                                        |
| TraesCS3A02G073800 | 46022717 |            |                | 0.06            |                                        |
| TraesCS3A02G073900 | 46067850 |            |                | 0.00            |                                        |
| TraesCS3A02G074000 | 46164880 |            |                | -0.27           | cleavage stimulation factor subunit 77 |
| TraesCS3A02G074100 | 46211647 |            |                | 0.00            |                                        |
| TraesCS3A02G074200 | 46457067 |            |                | 0.00            |                                        |
| TraesCS3A02G074300 | 46565724 |            |                | 1.33            |                                        |
| TraesCS3A02G074400 | 46574627 |            |                | 0.71            |                                        |
| TraesCS3A02G074500 | 46582312 |            |                | -0.26           |                                        |
| TraesCS3A02G074600 | 46604044 |            |                | 0.11            |                                        |
| TraesCS3A02G074700 | 46610924 |            |                | 0.00            |                                        |
| TraesCS3A02G074800 | 46713189 |            |                | 0.15            |                                        |
| TraesCS3A02G074900 | 46729244 |            |                | -0.24           |                                        |
| TraesCS3A02G075000 | 46829588 |            |                | -0.29           |                                        |
| TraesCS3A02G075100 | 46833853 |            |                | -0.09           |                                        |
| TraesCS3A02G075200 | 46844208 |            |                | 0.00            |                                        |
| TraesCS3A02G075300 | 46867165 |            |                | 0.00            |                                        |
| TraesCS3A02G075400 | 46870278 |            |                | -0.15           |                                        |
| TraesCS3A02G075500 | 46985549 |            |                | -0.19           |                                        |
| TraesCS3A02G075600 | 46992770 |            |                | 0.03            |                                        |

|                    |          |  |       |                                                         |
|--------------------|----------|--|-------|---------------------------------------------------------|
| TraesCS3A02G075700 | 47036289 |  | -0.33 |                                                         |
| TraesCS3A02G075800 | 47046436 |  | -0.09 |                                                         |
| TraesCS3A02G075900 | 47047692 |  | 1.06  |                                                         |
| TraesCS3A02G076000 | 47063604 |  | -0.28 | putative disease resistance RPP13-like protein 3        |
| TraesCS3A02G076100 | 47065853 |  | 0.36  |                                                         |
| TraesCS3A02G076200 | 47083095 |  | 0.61  |                                                         |
| TraesCS3A02G076300 | 47246260 |  | -0.71 |                                                         |
| TraesCS3A02G076400 | 47260433 |  | 0.01  |                                                         |
| TraesCS3A02G076500 | 47277052 |  | 1.26  |                                                         |
| TraesCS3A02G076600 | 47283507 |  | 7.48  | BTB/POZ and MATH domain-containing protein 2-like       |
| TraesCS3A02G076700 | 47491958 |  | 0.00  |                                                         |
| TraesCS3A02G076800 | 47524317 |  | 0.00  |                                                         |
| TraesCS3A02G076900 | 47821346 |  | -0.32 |                                                         |
| TraesCS3A02G077000 | 47825261 |  | 0.11  |                                                         |
| TraesCS3A02G077100 | 47847824 |  | -1.86 |                                                         |
| TraesCS3A02G077300 | 48663110 |  | 3.19  | Premnaspirodiene oxygenase                              |
| TraesCS3A02G077400 | 49478053 |  | -0.16 |                                                         |
| TraesCS3A02G077500 | 49504523 |  | -0.14 |                                                         |
| TraesCS3A02G077600 | 49973825 |  | -0.13 |                                                         |
| TraesCS3A02G077700 | 49980885 |  | -0.18 |                                                         |
| TraesCS3A02G077800 | 50365107 |  | 1.04  |                                                         |
| TraesCS3A02G077900 | 50382036 |  | 0.00  |                                                         |
| TraesCS3A02G078000 | 50436222 |  | 0.00  |                                                         |
| TraesCS3A02G078100 | 50546343 |  | -0.32 | ricin B-like lectin R40G3                               |
| TraesCS3A02G078200 | 50638990 |  | 0.09  |                                                         |
| TraesCS3A02G078300 | 50720217 |  | 0.22  |                                                         |
| TraesCS3A02G078400 | 50726169 |  | 0.51  | NAC domain-containing protein 29                        |
| TraesCS3A02G078500 | 50747138 |  | -0.16 |                                                         |
| TraesCS3A02G078600 | 50818561 |  | -0.37 | Endosomal targeting BRO1-like domain-containing protein |
| TraesCS3A02G078700 | 50888369 |  | -0.26 |                                                         |
| TraesCS3A02G078800 | 50889917 |  | -0.42 |                                                         |
| TraesCS3A02G078900 | 50896552 |  | -0.30 |                                                         |

|                    |          |  |       |                                                             |
|--------------------|----------|--|-------|-------------------------------------------------------------|
| TraesCS3A02G079000 | 50936049 |  | 0.00  |                                                             |
| TraesCS3A02G079100 | 50951929 |  | 0.00  |                                                             |
| TraesCS3A02G079200 | 51280020 |  | -0.27 |                                                             |
| TraesCS3A02G079300 | 51381392 |  | 2.06  | F-box protein PP2-B10-like                                  |
| TraesCS3A02G079400 | 51401167 |  | -0.04 |                                                             |
| TraesCS3A02G079500 | 51408022 |  | 7.42  | unknown                                                     |
| TraesCS3A02G079700 | 51696478 |  | 0.00  |                                                             |
| TraesCS3A02G079800 | 51750498 |  | 0.00  | Calmodulin-binding transcription activator 2                |
| TraesCS3A02G079900 | 51768701 |  | -0.20 |                                                             |
| TraesCS3A02G080000 | 51810649 |  | 0.00  |                                                             |
| TraesCS3A02G080100 | 51868745 |  | 2.45  | maturase, partial (mitochondrion)                           |
| TraesCS3A02G080200 | 51870813 |  | 4.60  | uncharacterized mitochondrial protein                       |
| TraesCS3A02G080300 | 51916014 |  | 0.00  |                                                             |
| TraesCS3A02G080400 | 51917341 |  | 1.98  | Cytochrome c oxidase subunit 1                              |
| TraesCS3A02G080500 | 51946648 |  | -6.68 | unknown                                                     |
| TraesCS3A02G080600 | 52207283 |  | 1.92  | protein PHLOEM PROTEIN 2-LIKE A10-like                      |
| TraesCS3A02G080700 | 52347273 |  | -0.32 |                                                             |
| TraesCS3A02G080800 | 52375618 |  | 0.50  |                                                             |
| TraesCS3A02G080900 | 52418687 |  | -0.08 |                                                             |
| TraesCS3A02G081000 | 52446596 |  | 0.00  |                                                             |
| TraesCS3A02G081100 | 52457399 |  | 1.46  | protein NRT1/ PTR FAMILY 6.1                                |
| TraesCS3A02G081200 | 52548451 |  | 0.00  |                                                             |
| TraesCS3A02G081300 | 52555769 |  | 1.39  | light-regulated protein [Aegilops tauschii subsp. tauschii] |
| TraesCS3A02G081400 | 52556940 |  | 0.04  |                                                             |
| TraesCS3A02G081500 | 52589221 |  | 0.00  |                                                             |
| TraesCS3A02G081600 | 52680461 |  | 0.00  |                                                             |
| TraesCS3A02G081700 | 52726292 |  | 0.00  |                                                             |
| TraesCS3A02G081800 | 53035863 |  | -0.21 |                                                             |
| TraesCS3A02G081900 | 53182880 |  | -0.29 |                                                             |
| TraesCS3A02G082000 | 53203757 |  | -0.09 |                                                             |
| TraesCS3A02G082100 | 53209389 |  | 0.15  |                                                             |
| TraesCS3A02G082200 | 53215407 |  | -6.28 | cysteine-rich repeat secretory protein 2-like               |

|                    |          |  |       |                                                                |
|--------------------|----------|--|-------|----------------------------------------------------------------|
| TraesCS3A02G082300 | 53217862 |  | 0.02  |                                                                |
| TraesCS3A02G082400 | 53256653 |  | -8.03 | NDR1/HIN1-like protein 3                                       |
| TraesCS3A02G082500 | 53293163 |  | 0.00  |                                                                |
| TraesCS3A02G082600 | 53323291 |  | 0.00  |                                                                |
| TraesCS3A02G082700 | 53332151 |  | -0.03 |                                                                |
| TraesCS3A02G082800 | 53342113 |  | -0.13 |                                                                |
| TraesCS3A02G082900 | 53414134 |  | 6.45  | cytochrome P450 704C1-like                                     |
| TraesCS3A02G083000 | 53553821 |  | 0.27  |                                                                |
| TraesCS3A02G083200 | 53559328 |  | 0.54  | non-specific phospholipase C6-like                             |
| TraesCS3A02G083300 | 53566802 |  | -0.28 |                                                                |
| TraesCS3A02G083400 | 53568768 |  | 1.66  | unknown                                                        |
| TraesCS3A02G083500 | 53569247 |  | -0.24 |                                                                |
| TraesCS3A02G083600 | 53738600 |  | 0.50  |                                                                |
| TraesCS3A02G083700 | 53832244 |  | 0.32  |                                                                |
| TraesCS3A02G083800 | 53838186 |  | -0.19 |                                                                |
| TraesCS3A02G083900 | 54232013 |  | 0.00  |                                                                |
| TraesCS3A02G084000 | 54283987 |  | 0.00  |                                                                |
| TraesCS3A02G084100 | 54325846 |  | 1.74  | transmembrane protein 45B-like                                 |
| TraesCS3A02G084200 | 54466317 |  | 0.00  |                                                                |
| TraesCS3A02G084300 | 54655350 |  | -0.25 |                                                                |
| TraesCS3A02G084400 | 54658038 |  | -0.09 |                                                                |
| TraesCS3A02G084500 | 54661648 |  | -0.04 |                                                                |
| TraesCS3A02G084600 | 54666578 |  | -0.29 |                                                                |
| TraesCS3A02G084700 | 54804477 |  | 7.46  | cytochrome P450 704C1-like                                     |
| TraesCS3A02G084800 | 54874740 |  | 0.25  |                                                                |
| TraesCS3A02G084900 | 54878375 |  | 0.24  |                                                                |
| TraesCS3A02G085000 | 54883449 |  | -1.14 | putative pentatricopeptide repeat-containing protein At2g01510 |
| TraesCS3A02G085200 | 54938812 |  | 0.01  |                                                                |
| TraesCS3A02G085300 | 55031174 |  | -0.11 |                                                                |
| TraesCS3A02G085400 | 55035634 |  | -0.14 |                                                                |
| TraesCS3A02G085500 | 55045418 |  | -0.32 |                                                                |
| TraesCS3A02G085600 | 55085818 |  | -0.06 |                                                                |

|                    |          |    |  |       |                                                                                                          |
|--------------------|----------|----|--|-------|----------------------------------------------------------------------------------------------------------|
| TraesCS3A02G085700 | 55223622 |    |  | 0.64  |                                                                                                          |
| TraesCS3A02G085800 | 55483864 |    |  | 0.00  |                                                                                                          |
| TraesCS3A02G085900 | 55501921 |    |  | 0.33  |                                                                                                          |
| TraesCS3A02G086000 | 55558213 |    |  | 0.00  |                                                                                                          |
| TraesCS3A02G086100 | 55705926 |    |  | -0.99 | Cytochrome P450 99A2                                                                                     |
| TraesCS3A02G086200 | 55716008 |    |  | -0.16 |                                                                                                          |
| TraesCS3A02G086300 | 55722831 |    |  | -6.23 | probable disease resistance protein Atlg61300                                                            |
| TraesCS3A02G086400 | 55737602 |    |  | -0.24 |                                                                                                          |
| TraesCS3A02G086500 | 55743110 |    |  | -7.36 | unknown                                                                                                  |
| TraesCS3A02G086600 | 55841050 |    |  | 0.00  |                                                                                                          |
| TraesCS3A02G086700 | 56133676 | HT |  | -0.17 | Glyoxysomal fatty acid beta-oxidation multifunctional protein MFP-a [Triticum urartu]                    |
| TraesCS3A02G086800 | 56141475 |    |  | -0.12 |                                                                                                          |
| TraesCS3A02G086900 | 56215736 |    |  | 0.21  | DNA-damage-repair/toleration protein DRT111, chloroplastic [Aegilops tauschii subsp. tauschii]           |
| TraesCS3A02G087000 | 56219767 |    |  | -0.32 | Cysteine synthase, chloroplastic/chromoplastic [Triticum urartu]                                         |
| TraesCS3A02G087100 | 56226520 |    |  | -0.27 | cysteine synthase-like                                                                                   |
| TraesCS3A02G087200 | 56389147 |    |  | 0.33  | ethylene-responsive transcription factor ERF056-like [Aegilops tauschii subsp. tauschii]                 |
| TraesCS3A02G087300 | 56390066 |    |  | 1.44  | putative NADP-dependent oxidoreductase P1                                                                |
| TraesCS3A02G087400 | 56395506 |    |  | -0.13 | putative uridine nucleosidase 2 [Zea mays]                                                               |
| TraesCS3A02G087500 | 56397840 |    |  | -0.11 | RAP domain-containing protein, chloroplastic [Aegilops tauschii subsp. tauschii]                         |
| TraesCS3A02G087600 | 56409237 |    |  | 0.00  | putative F-box/LRR-repeat protein At3g28410 [Aegilops tauschii subsp. tauschii]                          |
| TraesCS3A02G087700 | 56590829 |    |  | 1.13  | GDSL esterase/lipase Atlg33811-like                                                                      |
| TraesCS3A02G087800 | 56668613 |    |  | -0.33 | transcription factor GTE8-like [Aegilops tauschii subsp. tauschii]                                       |
| TraesCS3A02G087900 | 56734766 |    |  | 8.77  | RING-H2 finger protein ATL5-like                                                                         |
| TraesCS3A02G088000 | 56762904 |    |  | -0.82 | probable LRR receptor-like serine/threonine-protein kinase At3g47570 [Aegilops tauschii subsp. tauschii] |
| TraesCS3A02G088100 | 56765030 |    |  | 0.91  | probable LRR receptor-like serine/threonine-protein kinase At3g47570 [Aegilops tauschii subsp. tauschii] |
| TraesCS3A02G088200 | 56776222 |    |  | 0.00  | Subtilisin inhibitor 1 [Triticum urartu]                                                                 |
| TraesCS3A02G088300 | 56778942 |    |  | 0.00  | Subtilisin inhibitor 1 [Triticum urartu]                                                                 |
| TraesCS3A02G088400 | 56850923 |    |  | 0.00  | Subtilisin inhibitor 1 [Triticum urartu]                                                                 |
| TraesCS3A02G088500 | 56853792 |    |  | 0.00  | Subtilisin inhibitor 1 [Triticum urartu]                                                                 |

|                    |          |                   |       |                                                                                       |
|--------------------|----------|-------------------|-------|---------------------------------------------------------------------------------------|
| TraesCS3A02G088600 | 56858691 |                   | 0.00  | Subtilisin inhibitor 1 [Triticum urartu]                                              |
| TraesCS3A02G088700 | 56948633 |                   | 0.00  | Subtilisin inhibitor 1 [Triticum urartu]                                              |
| TraesCS3A02G088800 | 57013076 |                   | 0.53  | histone H2B.1-like [Aegilops tauschii subsp. tauschii]                                |
| TraesCS3A02G088900 | 57017091 |                   | -0.34 | Transpososon                                                                          |
| TraesCS3A02G089000 | 57090614 |                   | -0.21 | Aspartyl-tRNA synthetase [Triticum urartu]                                            |
| TraesCS3A02G089100 | 57154066 |                   | -7.73 |                                                                                       |
| TraesCS3A02G089200 | 57158330 |                   | -0.30 | protein BREAST CANCER SUSCEPTIBILITY 2 homolog B isoform X6                           |
| TraesCS3A02G089300 | 57195259 |                   | -7.23 | protein trichome birefringence-like 18                                                |
| TraesCS3A02G089400 | 57215581 |                   | 0.00  |                                                                                       |
| TraesCS3A02G089500 | 57226198 |                   | 0.00  |                                                                                       |
| TraesCS3A02G089600 | 57243781 |                   | 0.00  |                                                                                       |
| TraesCS3A02G089700 | 57260777 |                   | -0.38 | Dol-P-Man:Man(5)GlcNAc(2)-PP-Dol alpha-13-mannosyltransferase [Zea mays]              |
| TraesCS3A02G089900 | 57276120 |                   | 0.00  |                                                                                       |
| TraesCS3A02G090000 | 57277812 |                   | -0.20 | Transpososon                                                                          |
| TraesCS3A02G090100 | 57374570 |                   | -0.11 | Beta-hexosaminidase 3 [Hordeum vulgare]                                               |
| TraesCS3A02G090300 | 57481565 |                   | 0.00  | MADS-box transcription factor 29-like [Aegilops tauschii subsp. tauschii]             |
| TraesCS3A02G090400 | 57514756 |                   | 0.00  | chaperone protein ClpB1-like isoform X1 [Aegilops tauschii subsp. tauschii]           |
| TraesCS3A02G090500 | 57560501 |                   | -0.48 | zinc finger MYM-type protein 1-like, partial [Panicum hallii]                         |
| TraesCS3A02G090700 | 57611063 |                   | 0.00  |                                                                                       |
| TraesCS3A02G090800 | 57702664 |                   | -0.21 |                                                                                       |
| TraesCS3A02G090900 | 57715937 |                   | 0.00  | MADS-box transcription factor 29-like [Aegilops tauschii subsp. tauschii]             |
| TraesCS3A02G091000 | 57774541 |                   | 0.45  | STIP1-like protein                                                                    |
| TraesCS3A02G091100 | 57804104 |                   | -0.13 | Protein NSP-INTERACTING KINASE 3                                                      |
| TraesCS3A02G091200 | 57812878 |                   | 3.04  |                                                                                       |
| TraesCS3A02G091400 | 57855684 | <b>BS00013584</b> | 0.10  | SH3 domain-containing protein                                                         |
| TraesCS3A02G091500 | 57859957 |                   | 0.00  | Desiccation protectant protein Lea14-like protein                                     |
| TraesCS3A02G091600 | 57864567 |                   | -0.22 | tRNA pseudouridine(38/39) synthase isoform X2                                         |
| TraesCS3A02G091700 | 57873409 |                   | 0.00  |                                                                                       |
| TraesCS3A02G091800 | 57887384 |                   | -0.54 | G-type lectin S-receptor-like serine/threonine-protein kinase SD2-5 [Hordeum vulgare] |
| TraesCS3A02G091900 | 57894487 |                   | -2.89 | pentatricopeptide repeat-containing protein At1g66345, mitochondrial                  |



|                    |          |             |       |                                                                                                |
|--------------------|----------|-------------|-------|------------------------------------------------------------------------------------------------|
| TraesCS3A02G092000 | 57896894 |             | 0.14  | universal stress protein PHOS32-like [Aegilops tauschii subsp. tauschii]                       |
| TraesCS3A02G092100 | 57898825 |             | -0.83 |                                                                                                |
| TraesCS3A02G092200 | 57903709 |             | -1.09 | F-box/LRR-repeat protein 14-like                                                               |
| TraesCS3A02G092300 | 57943487 |             | 1.25  | probable LRR receptor-like serine/threonine-protein kinase At4g26540                           |
| TraesCS3A02G092400 | 57958367 |             | -0.43 | RNA-binding protein 10 isoform X3                                                              |
|                    | 58045380 | BS00065932  |       |                                                                                                |
| TraesCS3A02G092500 | 58077003 |             | 0.00  |                                                                                                |
| TraesCS3A02G092600 | 58467981 |             | 0.00  |                                                                                                |
| TraesCS3A02G092700 | 58683126 |             | 0.91  | putative ZmEBE-1 protein                                                                       |
| TraesCS3A02G092800 | 58836094 |             | 2.04  | galactinol--sucrose galactosyltransferase                                                      |
| TraesCS3A02G092900 | 58927199 |             | -0.21 | PREDICTED: vegetative cell wall protein gpl-like [Oryza brachyantha]                           |
| TraesCS3A02G093000 | 59424278 |             | 0.27  | tryptophan aminotransferase related 2                                                          |
| TraesCS3A02G093100 | 59508291 |             | -0.16 | protein RST1 isoform X1                                                                        |
|                    | 59521691 | BS59084809i |       |                                                                                                |
| TraesCS3A02G093200 | 59531321 |             | 1.54  | protein LATERAL ORGAN BOUNDARIES-like                                                          |
| TraesCS3A02G093300 | 59806641 |             | -0.44 | zinc finger protein 511                                                                        |
| TraesCS3A02G093400 | 59822956 |             | 1.33  | xyloglucan endotransglycosylase/hydrolase protein 8-like                                       |
| TraesCS3A02G093500 | 59954598 |             | 1.09  | xyloglucan endotransglycosylase/hydrolase protein 8-like                                       |
| TraesCS3A02G093600 | 60005281 |             | 0.45  | xyloglucan endotransglycosylase/hydrolase protein 8-like                                       |
| TraesCS3A02G093700 | 60028751 |             | 10.77 | Xyloglucan endotransglycosylase/hydrolase protein 8 [Triticum urartu]                          |
| TraesCS3A02G093800 | 60193220 |             | -6.38 | 60.2 Mb xyloglucan galactosyltransferase KATAMARI1 homolog [Aegilops tauschii subsp. tauschii] |
| TraesCS3A02G093900 | 60200264 |             | -0.24 | Subtilisin-chymotrypsin inhibitor-2A [Triticum urartu]                                         |
| TraesCS3A02G094000 | 60203935 |             | 2.44  | glycine-rich cell wall structural protein-like                                                 |
| TraesCS3A02G094100 | 60242518 |             | -7.44 |                                                                                                |
| TraesCS3A02G094200 | 60250917 |             | 0.00  |                                                                                                |
| TraesCS3A02G094300 | 60297385 |             | 0.00  | myb-related protein 305-like [Aegilops tauschii subsp. tauschii]                               |
| TraesCS3A02G094400 | 60434066 |             | 3.05  |                                                                                                |
| TraesCS3A02G094500 | 60441183 |             | 0.00  | premnaspirodiene oxygenase-like [Aegilops tauschii subsp. tauschii]                            |
| TraesCS3A02G094600 | 60446831 |             | 0.69  | Cellulose synthase-like protein G2 [Triticum urartu]                                           |
| TraesCS3A02G094700 | 60471506 |             | 0.00  | Premnaspirodiene oxygenase [Triticum urartu]                                                   |

|                    |          |                          |       |                                                                                                           |
|--------------------|----------|--------------------------|-------|-----------------------------------------------------------------------------------------------------------|
| TraesCS3A02G094800 | 60501708 |                          | 0.00  | U-box domain-containing protein 12-like [Aegilops tauschii subsp. tauschii]                               |
| TraesCS3A02G094900 | 60504891 |                          | 1.18  |                                                                                                           |
| TraesCS3A02G095000 | 60506864 |                          | 0.09  | probable leucine-rich repeat receptor-like protein kinase At5g49770 [Aegilops tauschii subsp. tauschii]   |
| TraesCS3A02G095100 | 60611287 |                          | 0.56  | dihydrolipoyllysine-residue acetyltransferase component of acetoin cleaving system-like [Hordeum vulgare] |
| TraesCS3A02G095200 | 60629607 |                          | -0.04 | Peptide-O-fucosyltransferase [Zostera marina]                                                             |
| TraesCS3A02G095300 | 60663849 |                          | -0.09 | WD repeat domain phosphoinositide-interacting protein 3 [Hordeum vulgare]                                 |
| TraesCS3A02G095400 | 60682662 |                          | -0.09 | RING finger and transmembrane domain-containing protein 2-like [Hordeum vulgare]                          |
| TraesCS3A02G095600 | 60842400 |                          | 0.00  | dimeric alpha-amylase inhibitor                                                                           |
| TraesCS3A02G095700 | 60867810 |                          | 0.00  | putative disease resistance RPP13-like protein 3 [Aegilops tauschii subsp. tauschii]                      |
| TraesCS3A02G095800 | 61213997 |                          | -0.07 |                                                                                                           |
|                    | 61219539 | BS00034344               |       |                                                                                                           |
|                    | 61308017 | BS00022844               |       |                                                                                                           |
| TraesCS3A02G095900 | 61308087 |                          | 1.75  |                                                                                                           |
| TraesCS3A02G096000 | 61311578 |                          | -1.37 | amino-acid permease BAT1 homolog                                                                          |
| TraesCS3A02G096100 | 61317610 |                          | 0.21  | putative F-box protein At1g47765                                                                          |
| TraesCS3A02G096200 | 61340198 | BS00003801               | 0.07  | protein NETWORKED 1A [Aegilops tauschii subsp. tauschii]                                                  |
| TraesCS3A02G096300 | 61346177 | BS00022516<br>BS00013997 | -0.04 | protein NETWORKED 1A [Aegilops tauschii subsp. tauschii]                                                  |
| TraesCS3A02G096400 | 61437310 |                          | 0.00  |                                                                                                           |
| TraesCS3A02G096500 | 61445227 |                          | -0.64 | cysteine-rich receptor-like protein kinase 2 isoform X2 [Aegilops tauschii subsp. tauschii]               |
| TraesCS3A02G096600 | 61478511 |                          | 1.18  | serine/threonine-protein phosphatase 7 long form homolog                                                  |
| TraesCS3A02G096700 | 61482512 |                          | 2.70  | pentatricopeptide repeat-containing protein At5g66631                                                     |
| TraesCS3A02G096800 | 62421465 |                          | -0.07 |                                                                                                           |
| TraesCS3A02G096900 | 62433938 |                          | 0.91  |                                                                                                           |
| TraesCS3A02G097000 | 62445661 |                          | -0.12 |                                                                                                           |
| TraesCS3A02G097100 | 63065555 |                          | -0.07 | Nucleotide/sugar transporter family protein [Zea mays]                                                    |
| TraesCS3A02G097200 | 63071948 |                          | -0.45 | mini-chromosome maintenance complex-binding protein                                                       |
|                    | 63074081 | BS00183592               |       |                                                                                                           |
| TraesCS3A02G097300 | 63076470 |                          | -0.05 | Proactivator polypeptide-like 1                                                                           |

|                    |          |  |       |                                                                                 |
|--------------------|----------|--|-------|---------------------------------------------------------------------------------|
| TraesCS3A02G097400 | 63130941 |  | 1.51  | extracellular glycosidase CRH11-like                                            |
| TraesCS3A02G097500 | 63175948 |  | 0.00  |                                                                                 |
| TraesCS3A02G097600 | 63177588 |  | -0.05 | probable staphylococcal-like nuclease CAN1 [Aegilops tauschii subsp. tauschii]  |
| TraesCS3A02G097700 | 63180956 |  | -0.14 | alpha-ketoglutarate-dependent dioxygenase alkB homolog 6 [Panicum hallii]       |
| TraesCS3A02G097800 | 63189474 |  | 0.55  | probable staphylococcal-like nuclease CAN1 [Aegilops tauschii subsp. tauschii]  |
| TraesCS3A02G097906 | 63383122 |  | -4.50 | pentatricopeptide repeat-containing protein At4g02750                           |
| TraesCS3A02G097900 | 63389133 |  | -6.23 | lecithin-cholesterol acyltransferase-like 1                                     |
| TraesCS3A02G098000 | 63432665 |  | 1.42  | SAWADEE HOMEODOMAIN HOMOLOG 2-like                                              |
| TraesCS3A02G098100 | 63434267 |  | 0.00  | lecithin-cholesterol acyltransferase-like 1 [Aegilops tauschii subsp. tauschii] |
| TraesCS3A02G098200 | 63472017 |  | -0.07 | Protein usf [Hordeum vulgare]                                                   |
| TraesCS3A02G098300 | 63476129 |  | 0.82  |                                                                                 |
| TraesCS3A02G098400 | 63485329 |  | 0.00  | Aspartic proteinase nepenthesin-2 [Hordeum vulgare]                             |
| TraesCS3A02G098500 | 63558216 |  | 2.85  |                                                                                 |
| TraesCS3A02G098600 | 63559737 |  | -0.21 | ARF guanine-nucleotide exchange factor GNOM-like                                |
| TraesCS3A02G098700 | 63571194 |  | 0.77  |                                                                                 |
| TraesCS3A02G098800 | 63837245 |  | 0.90  |                                                                                 |
| TraesCS3A02G098900 | 63905661 |  | -0.31 | Kelch-like protein 5 [Triticum urartu]                                          |
| TraesCS3A02G099000 | 64015552 |  | -0.41 |                                                                                 |
| TraesCS3A02G099100 | 64018774 |  | 0.12  | Dehydration-responsive element-binding protein 2A [Triticum urartu]             |
| TraesCS3A02G099200 | 64028173 |  | -0.49 | dehydration responsive element binding protein W73 [Triticum aestivum]          |
| TraesCS3A02G099300 | 64047378 |  | -0.37 | protein BREAST CANCER SUSCEPTIBILITY 2 homolog B isoform X4                     |
| TraesCS3A02G099400 | 64278873 |  | 2.50  | serine/threonine-protein kinase BRI1-like 2                                     |
| TraesCS3A02G099500 | 64284579 |  | 0.51  | dolichol-phosphate mannosyltransferase subunit 3-like                           |
| TraesCS3A02G099600 | 64287121 |  | -0.13 | Golgi to ER traffic protein 4 homolog [Aegilops tauschii subsp. tauschii]       |
| TraesCS3A02G099700 | 64301823 |  | 0.90  | sigma intracellular receptor 2 [Setaria italica]                                |
| TraesCS3A02G099800 | 64305205 |  | -0.36 | serine carboxypeptidase-like 17 [Aegilops tauschii subsp. tauschii]             |
| TraesCS3A02G099900 | 64315295 |  | -4.27 |                                                                                 |
| TraesCS3A02G100000 | 64729065 |  | -0.23 | putative protein phosphatase 2C 1 [Triticum urartu]                             |
| TraesCS3A02G100100 | 64779052 |  | -0.11 | ATP-dependent rRNA helicase spb4                                                |
| TraesCS3A02G100200 | 64788196 |  | -0.16 | DEAD-box ATP-dependent RNA helicase 40-like isoform                             |
| TraesCS3A02G100300 | 65343379 |  | -0.25 | transcription initiation factor TFIID subunit 15b [Hordeum vulgare]             |

|                    |          |  |  |       |                                                                                                |
|--------------------|----------|--|--|-------|------------------------------------------------------------------------------------------------|
| TraesCS3A02G100400 | 65350151 |  |  | -0.66 |                                                                                                |
| TraesCS3A02G100500 | 65360869 |  |  | 0.00  | non-classical arabinogalactan protein 30-like                                                  |
| TraesCS3A02G100600 | 65401536 |  |  | 0.00  | non-classical arabinogalactan protein 30-like [Aegilops tauschii subsp. tauschii]              |
| TraesCS3A02G100700 | 65403689 |  |  | -0.56 | pentatricopeptide repeat-containing protein At5g66520-like [Aegilops tauschii subsp. tauschii] |
| TraesCS3A02G100800 | 65433062 |  |  | 1.77  | receptor-like protein 12                                                                       |
| TraesCS3A02G100900 | 65466499 |  |  | 0.84  | 7-deoxyloganetin glucosyltransferase-like [Aegilops tauschii subsp. tauschii]                  |
| TraesCS3A02G101000 | 65477703 |  |  | 0.00  |                                                                                                |
| TraesCS3A02G101100 | 65701162 |  |  | 0.00  | BTR1-A-like protein [Triticum aestivum]                                                        |
| TraesCS3A02G101200 | 65764573 |  |  | 0.00  | BTR1-A-like protein [Triticum aestivum]                                                        |
| TraesCS3A02G101300 | 65828864 |  |  | 0.00  | BTR2-A [Triticum aestivum]                                                                     |
| TraesCS3A02G101400 | 65952061 |  |  | 0.91  | E3 ubiquitin-protein ligase [Hordeum vulgare]                                                  |
| TraesCS3A02G101500 | 65963197 |  |  | 0.00  | LRR receptor-like serine/threonine-protein kinase FLS2 [Hordeum vulgare]                       |
| TraesCS3A02G101600 | 65995530 |  |  | 10.00 | E3 ubiquitin-protein ligase SINA-like 10                                                       |
| TraesCS3A02G101700 | 66056962 |  |  | 0.18  | L-type lectin-domain containing receptor kinase IV.1-like                                      |
| TraesCS3A02G101800 | 66062348 |  |  | 0.05  | L-type lectin-domain containing receptor kinase IV.1-like [Aegilops tauschii subsp. tauschii]  |
| TraesCS3A02G101900 | 66067781 |  |  | 1.57  | chlorophyllase-2, chloroplastic-like                                                           |
| TraesCS3A02G102000 | 66165602 |  |  | 1.46  |                                                                                                |
| TraesCS3A02G102100 | 66216320 |  |  | -0.47 |                                                                                                |
| TraesCS3A02G102200 | 66221705 |  |  | -0.25 |                                                                                                |
| TraesCS3A02G102300 | 66227292 |  |  | 8.59  | GABA transporter 1-like isoform X2                                                             |
| TraesCS3A02G102400 | 66249912 |  |  | 0.86  | Histone H2A.1 [Triticum urartu]                                                                |
| TraesCS3A02G102500 | 66254049 |  |  | 1.59  | Histone H2B                                                                                    |
| TraesCS3A02G102600 | 66271251 |  |  | 0.19  |                                                                                                |
| TraesCS3A02G102700 | 66297954 |  |  | 0.00  |                                                                                                |
| TraesCS3A02G102800 | 66353465 |  |  | 0.89  | hexose carrier protein HEX6-like                                                               |
| TraesCS3A02G102900 | 66362604 |  |  | 0.25  |                                                                                                |
| TraesCS3A02G103000 | 66507059 |  |  | 0.01  |                                                                                                |
| TraesCS3A02G103100 | 66907810 |  |  | 0.80  |                                                                                                |
| TraesCS3A02G103200 | 66912987 |  |  | 6.76  | F-box protein At5g49610-like                                                                   |
| TraesCS3A02G103300 | 66922161 |  |  | 0.00  |                                                                                                |

|                    |          |            |       |                                                            |
|--------------------|----------|------------|-------|------------------------------------------------------------|
| TraesCS3A02G103400 | 67012730 |            | 0.00  |                                                            |
| TraesCS3A02G103500 | 67123770 |            | 0.87  | protein DELAY OF GERMINATION 1-like                        |
| TraesCS3A02G103600 | 67148999 |            | -0.51 |                                                            |
| TraesCS3A02G103700 | 67151954 |            | -0.30 |                                                            |
| TraesCS3A02G103800 | 67158231 |            | 0.14  |                                                            |
| TraesCS3A02G103900 | 67306364 |            | -0.05 |                                                            |
| TraesCS3A02G104000 | 67310163 |            | -0.35 |                                                            |
| TraesCS3A02G104100 | 67359581 |            | 1.62  | unknown                                                    |
| TraesCS3A02G104300 | 67383045 |            | 0.85  |                                                            |
| TraesCS3A02G104400 | 67785276 |            | 2.46  | putative transcription factor bHLH041 isoform X1           |
| TraesCS3A02G104500 | 67910921 |            | 0.00  | Translation machinery-associated protein 22                |
| TraesCS3A02G104600 | 68120031 |            | 1.50  | NDRI/HIN1-like protein 2                                   |
| TraesCS3A02G104700 | 68127664 |            | 10.50 | unknown                                                    |
| TraesCS3A02G104800 | 68274615 |            | -0.12 | proline-rich receptor-like protein kinase PERK9 isoform X3 |
| TraesCS3A02G104900 | 68283653 |            | -0.29 | pentatricopeptide repeat-containing protein At5g16860      |
| TraesCS3A02G105000 | 68289005 |            | -0.39 | Transcription factor IIIB 90 kDa subunit                   |
|                    | 68297904 | BS00185466 |       |                                                            |
| TraesCS3A02G105100 | 68867785 |            | 1.76  | protein indeterminate-domain 7-like                        |
| TraesCS3A02G105200 | 69055191 |            | -6.31 | unknown                                                    |
| TraesCS3A02G105300 | 69098083 |            | 14.68 | monothiol glutaredoxin-S2-like                             |
| TraesCS3A02G105400 | 69290641 |            | -0.31 | Regulatory protein NPR2                                    |
| TraesCS3A02G105500 | 69492806 |            | -0.18 | protein PHOSPHATE STARVATION RESPONSE 2-like isoform       |
| TraesCS3A02G105600 | 69504313 |            | 0.00  | protein IQ-DOMAIN 1-like                                   |
| TraesCS3A02G105700 | 69638980 |            | 0.83  |                                                            |
| TraesCS3A02G105800 | 69646592 |            | -0.32 |                                                            |
| TraesCS3A02G105900 | 69660730 |            | -0.33 |                                                            |
| TraesCS3A02G106000 | 69949381 |            | 0.00  |                                                            |
| TraesCS3A02G106100 | 70476390 |            | 9.61  | unknown                                                    |
| TraesCS3A02G106200 | 70702776 |            | -0.32 |                                                            |
| TraesCS3A02G106300 | 70712397 |            | -0.80 |                                                            |
| TraesCS3A02G106400 | 70713666 |            | 0.00  |                                                            |
| TraesCS3A02G106500 | 70730050 |            | 0.00  |                                                            |

|                    |          |  |       |                                              |
|--------------------|----------|--|-------|----------------------------------------------|
| TraesCS3A02G106600 | 70848330 |  | 9.85  | 1-aminocyclopropane-1-carboxylate synthase 7 |
| TraesCS3A02G106700 | 71146593 |  | -0.21 |                                              |
| TraesCS3A02G106800 | 71150103 |  | -5.96 | chaperone protein ClpB1-like                 |
| TraesCS3A02G106900 | 71155420 |  | 0.00  |                                              |
| TraesCS3A02G107000 | 71224173 |  | 1.01  |                                              |
| TraesCS3A02G107100 | 71243599 |  | 0.00  |                                              |
| TraesCS3A02G107200 | 71793752 |  | 0.48  |                                              |
| TraesCS3A02G107300 | 71801434 |  | 0.00  |                                              |
| TraesCS3A02G107400 | 72293193 |  | 0.25  | NAC domain-containing protein 8              |
| TraesCS3A02G107500 | 72412975 |  | -0.16 |                                              |
| TraesCS3A02G107600 | 72488099 |  | -0.09 |                                              |
| TraesCS3A02G107700 | 72492802 |  | -0.47 |                                              |
| TraesCS3A02G107800 | 72670618 |  | -0.21 | unknown                                      |
| TraesCS3A02G107900 | 72696221 |  | -0.14 |                                              |
| TraesCS3A02G108000 | 72896734 |  | 1.33  |                                              |
| TraesCS3A02G108100 | 73512378 |  | 1.30  | protein IQ-DOMAIN 14-like                    |
| TraesCS3A02G108200 | 73613611 |  | -0.19 |                                              |
| TraesCS3A02G108300 | 73873079 |  | 1.44  | momilactone A synthase-like                  |
| TraesCS3A02G108400 | 73929266 |  | 0.73  |                                              |
| TraesCS3A02G108500 | 74236262 |  | -0.36 | hexokinase1                                  |
| TraesCS3A02G108600 | 74360049 |  | -0.44 |                                              |
| TraesCS3A02G108700 | 74364854 |  | -0.33 |                                              |
| TraesCS3A02G108800 | 74427443 |  | 0.01  |                                              |
| TraesCS3A02G108900 | 74781464 |  | -0.41 |                                              |
| TraesCS3A02G109000 | 75017415 |  | 0.80  |                                              |
| TraesCS3A02G109100 | 75028319 |  | 0.01  |                                              |
| TraesCS3A02G109200 | 75148201 |  | -0.26 |                                              |
| TraesCS3A02G109300 | 75406115 |  | 0.54  |                                              |
| TraesCS3A02G109400 | 75411043 |  | -0.67 |                                              |
| TraesCS3A02G109500 | 75545535 |  | 8.36  | cytokinin oxidase, partia                    |
| TraesCS3A02G109600 | 75565436 |  | 0.05  |                                              |
| TraesCS3A02G109700 | 75590206 |  | -0.32 |                                              |

|                    |          |  |       |                                                    |
|--------------------|----------|--|-------|----------------------------------------------------|
| TraesCS3A02G109800 | 75626508 |  | 0.00  |                                                    |
| TraesCS3A02G109900 | 75954638 |  | 0.06  |                                                    |
| TraesCS3A02G110100 | 77471290 |  | -0.35 | protodermal factor 1-like                          |
| TraesCS3A02G110200 | 77474709 |  | 0.51  | unknown                                            |
| TraesCS3A02G110300 | 77483133 |  | -0.04 |                                                    |
| TraesCS3A02G110400 | 77535063 |  | -0.27 |                                                    |
| TraesCS3A02G110500 | 77548371 |  | 0.00  |                                                    |
| TraesCS3A02G110600 | 77594911 |  | 0.00  |                                                    |
| TraesCS3A02G110700 | 77708465 |  | 0.00  |                                                    |
| TraesCS3A02G110800 | 77771743 |  | 0.00  |                                                    |
| TraesCS3A02G110900 | 77912201 |  | -0.09 |                                                    |
| TraesCS3A02G111000 | 77939002 |  | -0.23 |                                                    |
| TraesCS3A02G111100 | 78189177 |  | -0.12 |                                                    |
| TraesCS3A02G111200 | 78710172 |  | 1.90  | WRKY transcription factor                          |
| TraesCS3A02G111300 | 78728574 |  | -0.35 |                                                    |
| TraesCS3A02G111400 | 78899641 |  | 0.92  |                                                    |
| TraesCS3A02G111500 | 79184692 |  | -0.28 |                                                    |
| TraesCS3A02G111600 | 79235061 |  | 6.41  | inactive tetrahydrocannabinolic acid synthase-like |
| TraesCS3A02G111700 | 79327173 |  | -0.50 |                                                    |
| TraesCS3A02G111800 | 79334643 |  | 0.00  |                                                    |
| TraesCS3A02G111900 | 79379811 |  | 0.10  |                                                    |
| TraesCS3A02G112000 | 79396194 |  | 3.15  | FACT complex subunit SSRP1                         |
| TraesCS3A02G112100 | 79400415 |  | 0.06  |                                                    |
| TraesCS3A02G112200 | 79400818 |  | 0.19  |                                                    |
| TraesCS3A02G112300 | 79444969 |  | -0.32 | homeobox-DDT domain protein RLT3-like isoform X1   |
| TraesCS3A02G112400 | 79874552 |  | 0.00  |                                                    |
| TraesCS3A02G112500 | 80081913 |  | 0.00  |                                                    |
| TraesCS3A02G112600 | 80088519 |  | -0.09 | ubiquitin-conjugating enzyme E2-like protein       |
| TraesCS3A02G112700 | 80102807 |  | 0.00  |                                                    |
| TraesCS3A02G112800 | 80218476 |  | -0.15 | DEAD-box ATP-dependent RNA helicase 39-like        |
| TraesCS3A02G112900 | 80225715 |  | -1.26 |                                                    |
| TraesCS3A02G113000 | 80288759 |  | 0.33  |                                                    |

|                    |                 |    |                   |       |                                                      |
|--------------------|-----------------|----|-------------------|-------|------------------------------------------------------|
| TraesCS3A02G113100 | 80412951        |    |                   | -0.21 |                                                      |
| TraesCS3A02G113200 | 80414183        |    |                   | -0.44 |                                                      |
| TraesCS3A02G113300 | 80431989        |    |                   | 0.00  |                                                      |
| TraesCS3A02G113400 | 80503366        |    |                   | 0.54  |                                                      |
| TraesCS3A02G113500 | 80686016        |    |                   | 0.02  |                                                      |
| TraesCS3A02G113600 | 80687298        |    |                   | -0.22 |                                                      |
| TraesCS3A02G113700 | 81086187        |    |                   | 0.23  | PHD finger protein rhinoceros                        |
| TraesCS3A02G113800 | 81094389        |    |                   | -0.12 |                                                      |
| TraesCS3A02G113900 | 81475905        |    |                   | 1.09  | probable galactinol--sucrose galactosyltransferase 2 |
|                    | <b>81477543</b> | HD | <b>BS00022624</b> |       |                                                      |
| TraesCS3A02G114000 | 81481700        |    |                   | -0.99 |                                                      |
| TraesCS3A02G114100 | 81662869        |    |                   | 0.00  |                                                      |
| TraesCS3A02G114200 | 81692163        |    |                   | -0.30 |                                                      |
| TraesCS3A02G114300 | 81695231        |    |                   | 0.19  |                                                      |
| TraesCS3A02G114400 | 81706567        |    |                   | 0.03  |                                                      |
| TraesCS3A02G114500 | 82112147        |    |                   | -3.33 | unknown                                              |
| TraesCS3A02G114600 | 82346228        |    |                   | -1.73 |                                                      |
| TraesCS3A02G114700 | 82392776        |    |                   | -1.41 |                                                      |
| TraesCS3A02G114800 | 82395603        |    |                   | 2.11  | nuclear transcription factor Y subunit C-6           |
| TraesCS3A02G114900 | 82439908        |    |                   | 1.14  |                                                      |
| TraesCS3A02G115000 | 82743340        |    |                   | 0.00  | unknown                                              |
| TraesCS3A02G115100 | 83021167        |    |                   | -1.59 |                                                      |
| TraesCS3A02G115200 | 83024352        |    |                   | 0.00  |                                                      |
| TraesCS3A02G115400 | 83231090        |    |                   | -0.67 |                                                      |
| TraesCS3A02G115500 | 83395843        |    |                   | 0.00  |                                                      |
| TraesCS3A02G115600 | 83518688        |    |                   | -0.23 |                                                      |
| TraesCS3A02G115700 | 83690873        |    |                   | 0.01  |                                                      |
| TraesCS3A02G115800 | 83720118        |    |                   | -0.22 |                                                      |
| TraesCS3A02G115900 | 83726446        |    |                   | -0.50 |                                                      |
| TraesCS3A02G116000 | 83731800        |    |                   | -0.12 | unknown                                              |
| TraesCS3A02G116100 | 83774289        |    |                   | 0.00  |                                                      |



|                    |          |        |       |                                         |
|--------------------|----------|--------|-------|-----------------------------------------|
| TraesCS3A02G116200 | 83977019 |        | 0.67  | putative WRKY transcription factor 13   |
| TraesCS3A02G116300 | 84184377 |        | -0.01 | TaGI                                    |
| TraesCS3A02G116400 | 84649308 |        | 0.39  |                                         |
| TraesCS3A02G116500 | 85270648 |        | 0.00  |                                         |
| TraesCS3A02G116600 | 85371496 |        | 0.00  |                                         |
| TraesCS3A02G116700 | 86121727 |        | -0.17 |                                         |
| TraesCS3A02G116800 | 86337358 |        | -0.93 |                                         |
| TraesCS3A02G116900 | 86366135 |        | -0.45 | TSL-kinase interacting protein 1-like   |
| TraesCS3A02G117000 | 86373844 |        | 2.26  | unknown                                 |
| TraesCS3A02G117100 | 86456768 |        | 0.15  |                                         |
| TraesCS3A02G117200 | 86625607 |        | 0.00  |                                         |
| TraesCS3A02G117300 | 87101511 |        | -0.01 |                                         |
| TraesCS3A02G117400 | 87361021 |        | -0.30 | DDT domain-containing protein DDR4-like |
| TraesCS3A02G117500 | 87372409 |        | 0.90  | DNA mismatch repair protein Msh6-2      |
| TraesCS3A02G117600 | 87775180 |        | 0.00  |                                         |
| TraesCS3A02G117700 | 88189193 |        | -0.08 |                                         |
| TraesCS3A02G117800 | 88542842 |        | -0.27 |                                         |
| TraesCS3A02G117900 | 88548543 |        | -0.48 |                                         |
| TraesCS3A02G118000 | 89572924 |        | 0.98  |                                         |
| TraesCS3A02G118100 | 89666058 |        | 0.00  |                                         |
|                    | 90117655 | wmc505 |       |                                         |
| TraesCS3A02G118200 | 90278241 |        | -0.33 |                                         |
| TraesCS3A02G118300 | 90293197 |        | 1.56  |                                         |
| TraesCS3A02G118400 | 90298975 |        | -0.27 |                                         |
| TraesCS3A02G118500 | 90364001 |        | 0.03  |                                         |
| TraesCS3A02G118600 | 90790420 |        | -0.22 |                                         |
| TraesCS3A02G118700 | 90857190 |        | -0.18 |                                         |
| TraesCS3A02G118800 | 90875218 |        | 0.00  |                                         |
| TraesCS3A02G118900 | 91006697 |        | -0.14 | unknown + retrotransposon               |
| TraesCS3A02G119000 | 91022006 |        | 0.14  |                                         |
| TraesCS3A02G119100 | 91025882 |        | -0.32 |                                         |

|                    |          |  |       |                                            |
|--------------------|----------|--|-------|--------------------------------------------|
| TraesCS3A02G119200 | 91284700 |  | 0.00  |                                            |
| TraesCS3A02G119300 | 91475181 |  | 0.00  |                                            |
| TraesCS3A02G119400 | 92257934 |  | 0.00  |                                            |
| TraesCS3A02G119500 | 93041129 |  | 1.79  |                                            |
| TraesCS3A02G119600 | 93263631 |  | 3.19  | acyl transferase 7-like                    |
| TraesCS3A02G119700 | 93263757 |  | 2.70  | putative PF02458-family acyl transferase 1 |
| TraesCS3A02G119800 | 93337258 |  | 3.71  | acyl transferase 7-like                    |
| TraesCS3A02G119900 | 93686897 |  | 0.00  |                                            |
| TraesCS3A02G120000 | 93703505 |  | 1.11  | unknown                                    |
| TraesCS3A02G120100 | 93894059 |  | 0.27  |                                            |
| TraesCS3A02G120200 | 93898636 |  | -0.27 |                                            |
| TraesCS3A02G120300 | 94115651 |  | 1.11  |                                            |
| TraesCS3A02G120400 | 94182146 |  | 0.00  |                                            |
| TraesCS3A02G120500 | 94186053 |  | 0.00  |                                            |
| TraesCS3A02G120600 | 94253695 |  | 0.00  |                                            |
| TraesCS3A02G120700 | 94857724 |  | 0.00  |                                            |
| TraesCS3A02G120800 | 95016020 |  | 0.30  |                                            |
| TraesCS3A02G120900 | 95017877 |  | -0.16 | transposon                                 |
| TraesCS3A02G121000 | 95125742 |  | 0.00  |                                            |
| TraesCS3A02G121100 | 95133054 |  | 0.00  |                                            |
| TraesCS3A02G121200 | 95358043 |  | 0.00  |                                            |
| TraesCS3A02G121300 | 95476976 |  | 0.04  |                                            |
| TraesCS3A02G121400 | 95527016 |  | -0.08 |                                            |
| TraesCS3A02G121500 | 95531831 |  | 0.19  | Transmembrane protein 19                   |
| TraesCS3A02G121600 | 95535104 |  | 0.72  | tudor domain-containing protein 3          |
| TraesCS3A02G121700 | 95539373 |  | -0.44 |                                            |
| TraesCS3A02G121800 | 95578222 |  | 0.00  |                                            |
| TraesCS3A02G121900 | 95894152 |  | 0.00  |                                            |
| TraesCS3A02G122000 | 95940842 |  | 3.23  | putative carboxylesterase 13               |
| TraesCS3A02G122100 | 95944206 |  | -0.15 |                                            |
| TraesCS3A02G122200 | 96241570 |  | -0.18 |                                            |

|                    |           |  |       |                                         |
|--------------------|-----------|--|-------|-----------------------------------------|
| TraesCS3A02G122300 | 96682449  |  | 1.18  | Wall-associated receptor kinase-like 20 |
| TraesCS3A02G122400 | 97046712  |  | 0.04  |                                         |
| TraesCS3A02G122500 | 97467084  |  | -0.49 |                                         |
| TraesCS3A02G122600 | 97972874  |  | 1.81  | Gibberellin 3-beta-dioxygenase 2-1      |
| TraesCS3A02G122700 | 98507031  |  | -1.00 |                                         |
| TraesCS3A02G122800 | 98513729  |  | -0.15 | unknown                                 |
| TraesCS3A02G122900 | 98826682  |  | -0.31 | Ubiquitin carboxyl-terminal hydrolase   |
| TraesCS3A02G123000 | 98840535  |  | 0.46  |                                         |
| TraesCS3A02G123100 | 98956012  |  | -0.16 |                                         |
| TraesCS3A02G123200 | 99268243  |  | 0.00  |                                         |
| TraesCS3A02G123300 | 99296629  |  | 0.00  |                                         |
| TraesCS3A02G123400 | 99387339  |  | 0.00  |                                         |
| TraesCS3A02G123500 | 99587987  |  | 0.00  |                                         |
| TraesCS3A02G123600 | 99622164  |  | 0.33  |                                         |
| TraesCS3A02G123700 | 99994063  |  | 1.18  | myb family transcription factor EFM     |
| TraesCS3A02G123800 | 100011353 |  | -0.36 |                                         |
| TraesCS3A02G123900 | 100014858 |  | 2.06  | coleoptile phototropism protein 1-like  |
| TraesCS3A02G124100 | 100188168 |  | -0.24 | protein gamma response 1                |
| TraesCS3A02G124200 | 100345414 |  | -7.18 |                                         |
| TraesCS3A02G124300 | 100409006 |  | 0.20  |                                         |
| TraesCS3A02G124400 | 100429928 |  | 0.27  |                                         |
| TraesCS3A02G124500 | 100828204 |  | -0.01 |                                         |
| TraesCS3A02G124600 | 100834044 |  | -0.18 |                                         |
| TraesCS3A02G124700 | 100841262 |  | 0.31  |                                         |
| TraesCS3A02G124800 | 100842613 |  | -0.04 |                                         |
| TraesCS3A02G124900 | 100847782 |  | 0.00  |                                         |
| TraesCS3A02G125000 | 100863961 |  | 2.33  | unknown                                 |
| TraesCS3A02G125100 | 100877847 |  | 0.61  |                                         |
| TraesCS3A02G125200 | 100880788 |  | -0.12 |                                         |
| TraesCS3A02G125300 | 100885506 |  | 0.01  | chloride channel protein CLC-c-like     |
| TraesCS3A02G125400 | 100946636 |  | 0.00  |                                         |

|                    |           |  |       |                                                   |
|--------------------|-----------|--|-------|---------------------------------------------------|
| TraesCS3A02G125500 | 100958315 |  | 1.39  |                                                   |
| TraesCS3A02G125600 | 100975593 |  | 0.00  |                                                   |
| TraesCS3A02G125700 | 101099681 |  | 9.42  | zeatin O-glucosyltransferase 3                    |
| TraesCS3A02G125800 | 101567459 |  | 3.34  | UDP-glycosyltransferase 73C5-like                 |
| TraesCS3A02G125900 | 101608015 |  | 1.50  |                                                   |
| TraesCS3A02G126000 | 101776593 |  | 3.63  | unknown                                           |
| TraesCS3A02G126100 | 101866028 |  | 0.00  |                                                   |
| TraesCS3A02G126200 | 101891087 |  | 0.00  |                                                   |
| TraesCS3A02G126300 | 101893744 |  | 0.24  |                                                   |
| TraesCS3A02G126600 | 102115581 |  | -6.49 |                                                   |
| TraesCS3A02G126800 | 102274744 |  | -9.54 |                                                   |
| TraesCS3A02G126900 | 102359953 |  | 0.00  |                                                   |
| TraesCS3A02G127000 | 102435711 |  | 6.99  | unknown                                           |
| TraesCS3A02G127100 | 102554499 |  | 0.65  |                                                   |
| TraesCS3A02G127200 | 102615927 |  | -0.17 |                                                   |
| TraesCS3A02G127300 | 102623417 |  | 10.89 | uncharacterized acetyltransferase At3g50280-like  |
| TraesCS3A02G127400 | 102677471 |  | -0.25 |                                                   |
| TraesCS3A02G127500 | 102686298 |  | 0.00  |                                                   |
| TraesCS3A02G127600 | 102794069 |  | 0.00  |                                                   |
| TraesCS3A02G127700 | 103618043 |  | 0.11  |                                                   |
| TraesCS3A02G127800 | 104414814 |  | -0.25 |                                                   |
| TraesCS3A02G127900 | 104419888 |  | -0.25 |                                                   |
| TraesCS3A02G128000 | 104557653 |  | -0.25 |                                                   |
| TraesCS3A02G128100 | 105026576 |  | 0.00  |                                                   |
| TraesCS3A02G128200 | 105111804 |  | 1.88  | protein kinase PINOID 2                           |
| TraesCS3A02G128300 | 105712838 |  | 0.00  |                                                   |
| TraesCS3A02G128400 | 105944440 |  | 0.00  |                                                   |
| TraesCS3A02G128500 | 105946479 |  | -0.46 |                                                   |
| TraesCS3A02G128600 | 106303465 |  | -0.37 |                                                   |
| TraesCS3A02G128700 | 106396973 |  | 0.68  | BTB/POZ and MATH domain-containing protein 1-like |
| TraesCS3A02G128800 | 106401457 |  | -0.29 |                                                   |

|                    |           |            |       |                                                                  |
|--------------------|-----------|------------|-------|------------------------------------------------------------------|
| TraesCS3A02G128900 | 106433266 |            | 0.27  |                                                                  |
| TraesCS3A02G129000 | 106434735 |            | -0.40 | ABC transporter C family member 3-like                           |
|                    | 106434896 | BS00022148 |       |                                                                  |
| TraesCS3A02G129100 | 106555889 |            | 0.47  | Glyoxalase                                                       |
| TraesCS3A02G129200 | 106657461 |            | -0.36 |                                                                  |
| TraesCS3A02G129300 | 106659927 |            | 0.10  |                                                                  |
| TraesCS3A02G129400 | 106660848 |            | 0.00  |                                                                  |
| TraesCS3A02G129500 | 106676627 |            | 0.00  |                                                                  |
| TraesCS3A02G129600 | 106834395 |            | 1.23  |                                                                  |
| TraesCS3A02G129700 | 107043940 |            | 3.80  | unknown                                                          |
| TraesCS3A02G129800 | 107047681 |            | 0.74  |                                                                  |
| TraesCS3A02G129900 | 107052572 |            | 0.28  |                                                                  |
| TraesCS3A02G130000 | 107076189 |            | -0.07 |                                                                  |
| TraesCS3A02G130100 | 107316698 |            | -0.24 |                                                                  |
| TraesCS3A02G130200 | 107397424 |            | -0.13 |                                                                  |
| TraesCS3A02G130300 | 107402918 |            | -0.14 | phosphoenolpyruvate/phosphate translocator 3, chloroplastic-like |
| TraesCS3A02G130400 | 107416364 |            | 0.00  |                                                                  |
| TraesCS3A02G130500 | 107418238 |            | -0.12 |                                                                  |
| TraesCS3A02G130600 | 107528741 |            | 0.00  |                                                                  |
| TraesCS3A02G130700 | 107565870 |            | 0.00  |                                                                  |
| TraesCS3A02G130800 | 107619668 |            | 2.12  | unknown                                                          |
| TraesCS3A02G130900 | 107653078 |            | -0.57 | unknown                                                          |
| TraesCS3A02G131000 | 107732788 |            | -0.32 |                                                                  |
| TraesCS3A02G131100 | 107744078 |            | 0.00  |                                                                  |
| TraesCS3A02G131200 | 107755822 |            | 1.34  | probable carboxylesterase 15                                     |
| TraesCS3A02G131300 | 107758099 |            | 0.00  |                                                                  |
| TraesCS3A02G131400 | 107863262 |            | 6.84  | RING-H2 finger protein ATL65-like                                |
| TraesCS3A02G131500 | 107975081 |            | 2.25  | RING-H2 finger protein ATL39-like                                |
| TraesCS3A02G131600 | 108033015 |            | 2.09  | jacalin-related lectin 19-like                                   |
| TraesCS3A02G131700 | 108373401 |            | 0.29  | protein SPEAR2                                                   |
| TraesCS3A02G131800 | 108457488 |            | 0.14  |                                                                  |

|                    |           |  |       |                                                                  |
|--------------------|-----------|--|-------|------------------------------------------------------------------|
| TraesCS3A02G131900 | 108729433 |  | 0.72  | basic leucine zipper 2-like                                      |
| TraesCS3A02G132000 | 108744935 |  | 2.08  |                                                                  |
| TraesCS3A02G132100 | 108879584 |  | -0.44 |                                                                  |
| TraesCS3A02G132200 | 108918715 |  | -1.83 | unknown                                                          |
| TraesCS3A02G132300 | 108952141 |  | 0.56  |                                                                  |
| TraesCS3A02G132400 | 109149213 |  | -0.14 |                                                                  |
| TraesCS3A02G132500 | 109297969 |  | 0.52  |                                                                  |
| TraesCS3A02G132600 | 109341955 |  | 1.20  |                                                                  |
| TraesCS3A02G132700 | 109867886 |  | 0.96  |                                                                  |
| TraesCS3A02G132800 | 109869449 |  | 0.00  |                                                                  |
| TraesCS3A02G132900 | 109871699 |  | 0.04  |                                                                  |
| TraesCS3A02G133000 | 110000112 |  | 1.60  | putative cyclin-dependent kinase F-2                             |
| TraesCS3A02G133100 | 110069451 |  | 1.39  |                                                                  |
| TraesCS3A02G133200 | 110151139 |  | 0.00  |                                                                  |
| TraesCS3A02G133300 | 110309461 |  | -0.27 |                                                                  |
| TraesCS3A02G133400 | 110332577 |  | 0.88  | gibberellin 2-beta-dioxygenase 1-like                            |
| TraesCS3A02G133500 | 110680985 |  | -0.29 | unknown                                                          |
| TraesCS3A02G133600 | 110777434 |  | -0.09 |                                                                  |
| TraesCS3A02G133700 | 110788290 |  | -0.03 |                                                                  |
| TraesCS3A02G133900 | 111103486 |  | 1.91  |                                                                  |
| TraesCS3A02G134000 | 111105593 |  | 0.94  |                                                                  |
| TraesCS3A02G134100 | 111243704 |  | -0.24 |                                                                  |
| TraesCS3A02G134200 | 111550279 |  | 0.82  |                                                                  |
| TraesCS3A02G134300 | 111555102 |  | 0.03  |                                                                  |
| TraesCS3A02G134400 | 111807173 |  | 0.00  |                                                                  |
| TraesCS3A02G134500 | 111824319 |  | 0.71  |                                                                  |
| TraesCS3A02G134600 | 111961695 |  | 1.39  |                                                                  |
| TraesCS3A02G134700 | 112296815 |  | 0.00  |                                                                  |
| TraesCS3A02G134800 | 112409703 |  | 0.00  |                                                                  |
| TraesCS3A02G134900 | 112917876 |  | -0.36 | peptide-N4-(N-acetyl-beta-glucosaminyl)asparagine amidase A-like |
| TraesCS3A02G135000 | 112925350 |  | -1.73 |                                                                  |

|                    |           |  |       |                                               |
|--------------------|-----------|--|-------|-----------------------------------------------|
| TraesCS3A02G135100 | 112936618 |  | -0.12 |                                               |
| TraesCS3A02G135200 | 112943978 |  | 0.00  |                                               |
| TraesCS3A02G135300 | 112947180 |  | 0.11  |                                               |
| TraesCS3A02G135400 | 112950898 |  | 0.15  |                                               |
| TraesCS3A02G135500 | 112957446 |  | -0.29 |                                               |
| TraesCS3A02G135600 | 112961349 |  | 1.02  |                                               |
| TraesCS3A02G135700 | 113340512 |  | 1.39  | putative CBL-interacting protein kinase 13    |
| TraesCS3A02G135800 | 113354731 |  | -0.08 |                                               |
| TraesCS3A02G135900 | 113365783 |  | 0.00  |                                               |
| TraesCS3A02G136000 | 113709059 |  | 0.00  |                                               |
| TraesCS3A02G136100 | 113709769 |  | 0.48  |                                               |
| TraesCS3A02G136200 | 113870607 |  | 0.00  |                                               |
| TraesCS3A02G136300 | 113921279 |  | 1.74  |                                               |
| TraesCS3A02G136500 | 114041077 |  | -0.19 | SHAGGY-like kinase (related to AtBIN2)        |
| TraesCS3A02G136600 | 114047082 |  | 0.56  |                                               |
| TraesCS3A02G136700 | 114237731 |  | 1.25  | enoyl-CoA delta isomerase 2, peroxisomal-like |
| TraesCS3A02G136800 | 114239777 |  | -0.32 |                                               |
| TraesCS3A02G136900 | 114421566 |  | 0.09  |                                               |
| TraesCS3A02G137000 | 114422943 |  | -0.32 |                                               |
| TraesCS3A02G137100 | 114426404 |  | -0.25 |                                               |
| TraesCS3A02G137200 | 114433342 |  | 0.00  |                                               |
| TraesCS3A02G137300 | 114443998 |  | 0.00  |                                               |
| TraesCS3A02G137400 | 114540087 |  | 0.00  |                                               |
| TraesCS3A02G137500 | 114567344 |  | -0.26 |                                               |
| TraesCS3A02G137600 | 114568067 |  | 0.62  | UMP-CMP kinase 1-like                         |
| TraesCS3A02G137700 | 114695981 |  | 0.00  |                                               |
| TraesCS3A02G137900 | 114712488 |  | 0.83  |                                               |
| TraesCS3A02G138000 | 114770298 |  | 2.52  | protein GRAVITROPIC IN THE LIGHT 1            |
| TraesCS3A02G138100 | 114793466 |  | -0.49 |                                               |
| TraesCS3A02G138200 | 115162195 |  | 0.32  | Subtilisin-like protease                      |
| TraesCS3A02G138300 | 115389817 |  | -2.05 | Subtilisin-like protease                      |

|                    |           |  |       |                                                                    |
|--------------------|-----------|--|-------|--------------------------------------------------------------------|
| TraesCS3A02G138400 | 115839464 |  | -1.83 |                                                                    |
| TraesCS3A02G138500 | 115847640 |  | 0.00  |                                                                    |
| TraesCS3A02G138600 | 116074087 |  | -2.07 |                                                                    |
| TraesCS3A02G138700 | 116100432 |  | 7.31  | unknown                                                            |
| TraesCS3A02G138900 | 116284377 |  | 0.08  |                                                                    |
| TraesCS3A02G139000 | 116518694 |  | 0.07  |                                                                    |
| TraesCS3A02G139100 | 116525681 |  | 0.00  |                                                                    |
| TraesCS3A02G139200 | 116527572 |  | -0.16 | serine/threonine-protein phosphatase 5                             |
| TraesCS3A02G139300 | 117227850 |  | 0.57  |                                                                    |
| TraesCS3A02G139400 | 117788639 |  | 0.00  |                                                                    |
| TraesCS3A02G139500 | 117805633 |  | -0.09 |                                                                    |
| TraesCS3A02G139600 | 117827720 |  | -0.05 |                                                                    |
| TraesCS3A02G139700 | 118546170 |  | 4.39  | RING-H2 finger protein ATL39                                       |
| TraesCS3A02G139800 | 118546567 |  | 0.00  |                                                                    |
| TraesCS3A02G139900 | 118566831 |  | 1.35  |                                                                    |
| TraesCS3A02G140000 | 118587495 |  | 2.17  | RING-H2 finger protein ATL74-like                                  |
| TraesCS3A02G140100 | 119137149 |  | 0.71  |                                                                    |
| TraesCS3A02G140200 | 119470233 |  | -0.27 |                                                                    |
| TraesCS3A02G140300 | 119473835 |  | -0.14 | uncharacterized aarF domain-containing protein kinase 1 isoform X3 |
| TraesCS3A02G140400 | 119485894 |  | 0.00  |                                                                    |
| TraesCS3A02G140500 | 119686627 |  | 0.20  |                                                                    |
| TraesCS3A02G140600 | 119693993 |  | -0.30 |                                                                    |
| TraesCS3A02G140700 | 119697917 |  | 0.90  |                                                                    |
| TraesCS3A02G140800 | 120175318 |  | 0.00  |                                                                    |
| TraesCS3A02G140900 | 120223456 |  | 0.68  |                                                                    |
| TraesCS3A02G141000 | 120227737 |  | 0.00  |                                                                    |
| TraesCS3A02G141100 | 120266288 |  | 0.85  | GDSL esterase/lipase                                               |
| TraesCS3A02G141200 | 120296042 |  | -0.63 |                                                                    |
| TraesCS3A02G141300 | 120357124 |  | 0.74  |                                                                    |
| TraesCS3A02G141400 | 120692119 |  | 8.13  | putative esterase                                                  |
| TraesCS3A02G141500 | 120801205 |  | 0.79  |                                                                    |



|                    |           |  |       |                                                                                                               |
|--------------------|-----------|--|-------|---------------------------------------------------------------------------------------------------------------|
| TraesCS3A02G141600 | 121235606 |  | 0.00  |                                                                                                               |
| TraesCS3A02G141700 | 121317335 |  | 0.00  |                                                                                                               |
| TraesCS3A02G141800 | 121327477 |  | 0.00  |                                                                                                               |
| TraesCS3A02G141900 | 121387722 |  | -0.39 | Putative SWI/SNF-related matrix-associated actin-dependent regulator of chromatin subfamily A member 3-like 2 |
| TraesCS3A02G142000 | 121479361 |  | 0.00  |                                                                                                               |
| TraesCS3A02G142100 | 121484171 |  | -0.43 |                                                                                                               |
| TraesCS3A02G142200 | 121644384 |  | -0.02 |                                                                                                               |
| TraesCS3A02G142300 | 122208067 |  | -1.01 |                                                                                                               |
| TraesCS3A02G142400 | 122222409 |  | 0.00  |                                                                                                               |
| TraesCS3A02G142500 | 122229366 |  | -0.69 |                                                                                                               |
| TraesCS3A02G142600 | 122464482 |  | 7.84  | LINE-1 retrotransposable element ORF2 protein                                                                 |
| TraesCS3A02G142700 | 123045617 |  | 0.60  |                                                                                                               |
| TraesCS3A02G142800 | 123277990 |  | -0.25 |                                                                                                               |
| TraesCS3A02G142900 | 123284926 |  | 0.79  | transcription factor bHLH30-like                                                                              |
| TraesCS3A02G143000 | 123326283 |  | -0.24 |                                                                                                               |
| TraesCS3A02G143100 | 124172881 |  | 1.87  | FT-like protein (FT2)                                                                                         |
| TraesCS3A02G143200 | 124179766 |  | -0.21 |                                                                                                               |
| TraesCS3A02G143300 | 124187662 |  | -0.33 |                                                                                                               |
| TraesCS3A02G143400 | 124655539 |  | 1.52  |                                                                                                               |
| TraesCS3A02G143500 | 124658180 |  | -0.20 |                                                                                                               |
| TraesCS3A02G143600 | 125092210 |  | -0.32 |                                                                                                               |
| TraesCS3A02G143700 | 125368934 |  | 0.00  |                                                                                                               |
| TraesCS3A02G143800 | 125422646 |  | 1.07  |                                                                                                               |
| TraesCS3A02G143900 | 125484253 |  | -0.01 |                                                                                                               |
| TraesCS3A02G144000 | 125488067 |  | 0.28  | probable F-box protein At3g61730                                                                              |
| TraesCS3A02G144100 | 125496055 |  | -0.24 |                                                                                                               |
| TraesCS3A02G144200 | 126035274 |  | 0.00  |                                                                                                               |
| TraesCS3A02G144400 | 126119669 |  | 0.00  |                                                                                                               |
| TraesCS3A02G144500 | 127071707 |  | 0.00  |                                                                                                               |
| TraesCS3A02G144600 | 127088113 |  | 0.00  |                                                                                                               |

|                    |           |  |       |                                                 |
|--------------------|-----------|--|-------|-------------------------------------------------|
| TraesCS3A02G144700 | 127192010 |  | -0.33 |                                                 |
| TraesCS3A02G144800 | 127271681 |  | 0.13  |                                                 |
| TraesCS3A02G144900 | 127353948 |  | -0.69 |                                                 |
| TraesCS3A02G145000 | 127820224 |  | 0.00  |                                                 |
| TraesCS3A02G145100 | 127856285 |  | -6.16 |                                                 |
| TraesCS3A02G145200 | 127865530 |  | 7.56  | unknown                                         |
| TraesCS3A02G145300 | 127870047 |  | 1.23  |                                                 |
| TraesCS3A02G145400 | 127959332 |  | 0.00  |                                                 |
| TraesCS3A02G145500 | 127961941 |  | -7.71 |                                                 |
| TraesCS3A02G145600 | 127965591 |  | 0.00  |                                                 |
| TraesCS3A02G145700 | 127973254 |  | -0.13 |                                                 |
| TraesCS3A02G145900 | 128082220 |  | -0.12 |                                                 |
| TraesCS3A02G146000 | 128138163 |  | 0.00  |                                                 |
| TraesCS3A02G146100 | 128150132 |  | -0.38 | putative glycerol-3-phosphate acyltransferase 3 |
| TraesCS3A02G146200 | 128152904 |  | 0.05  |                                                 |
| TraesCS3A02G146300 | 128164849 |  | 0.63  |                                                 |
| TraesCS3A02G146400 | 128216943 |  | 0.02  |                                                 |
| TraesCS3A02G146500 | 128287161 |  | 0.57  |                                                 |
| TraesCS3A02G146600 | 128293099 |  | -0.13 |                                                 |
| TraesCS3A02G146700 | 128302328 |  | -0.34 |                                                 |
| TraesCS3A02G146800 | 128522801 |  | 0.47  |                                                 |
| TraesCS3A02G146900 | 128539724 |  | 0.03  |                                                 |
| TraesCS3A02G147000 | 128559103 |  | 0.24  |                                                 |
| TraesCS3A02G147100 | 128564553 |  | -0.53 |                                                 |
| TraesCS3A02G147200 | 128578407 |  | 1.75  | glycerol-3-phosphate acyltransferase 1          |
| TraesCS3A02G147300 | 128582053 |  | -0.20 |                                                 |
| TraesCS3A02G147400 | 128658771 |  | 0.00  |                                                 |
| TraesCS3A02G147500 | 128716737 |  | 0.05  |                                                 |
| TraesCS3A02G147600 | 130834630 |  | 0.86  |                                                 |
| TraesCS3A02G147700 | 130836644 |  | -0.16 |                                                 |
| TraesCS3A02G147800 | 130842186 |  | -1.17 |                                                 |

|                    |           |  |       |                                                       |
|--------------------|-----------|--|-------|-------------------------------------------------------|
| TraesCS3A02G147900 | 130851402 |  | -0.06 |                                                       |
| TraesCS3A02G148000 | 130896344 |  | 2.03  |                                                       |
| TraesCS3A02G148100 | 130966615 |  | 1.26  | putative E3 ubiquitin-protein ligase LIN-1 isoform X1 |
| TraesCS3A02G148200 | 131343237 |  | -0.03 |                                                       |
| TraesCS3A02G148300 | 131348327 |  | -0.06 |                                                       |
| TraesCS3A02G148400 | 131402757 |  | 0.14  |                                                       |
| TraesCS3A02G148500 | 131415189 |  | 0.06  |                                                       |
| TraesCS3A02G148600 | 131422559 |  | 0.11  |                                                       |
| TraesCS3A02G148700 | 131458286 |  | -0.08 |                                                       |
| TraesCS3A02G148800 | 131646148 |  | 0.39  |                                                       |
| TraesCS3A02G148900 | 131749774 |  | -0.07 |                                                       |
| TraesCS3A02G149000 | 132581440 |  | 0.99  | ethylene-responsive transcription factor CRF1-like    |
| TraesCS3A02G149100 | 134234662 |  | -0.16 |                                                       |
| TraesCS3A02G149200 | 134237719 |  | 1.28  |                                                       |
| TraesCS3A02G149300 | 134240740 |  | -0.11 | mitochondrial carrier protein MTM1-like               |
| TraesCS3A02G149400 | 134245584 |  | 0.02  |                                                       |
| TraesCS3A02G149500 | 134600543 |  | 0.00  |                                                       |
| TraesCS3A02G149600 | 134613198 |  | 0.00  |                                                       |
| TraesCS3A02G149700 | 135378286 |  | 0.00  |                                                       |
| TraesCS3A02G149800 | 135968322 |  | -0.32 |                                                       |
| TraesCS3A02G149900 | 136427933 |  | 1.02  | mitochondrial arginine transporter BAC2               |
| TraesCS3A02G150000 | 136526562 |  | 0.51  | no hits                                               |
| TraesCS3A02G150100 | 136528443 |  | -0.20 | unknown                                               |
| TraesCS3A02G150200 | 136567573 |  | -0.05 |                                                       |
| TraesCS3A02G150300 | 137574043 |  | -0.15 |                                                       |
| TraesCS3A02G150400 | 137591590 |  | -0.12 | GTP binding                                           |
| TraesCS3A02G150500 | 137600605 |  | -9.23 |                                                       |
| TraesCS3A02G150600 | 137609236 |  | -0.59 |                                                       |
| TraesCS3A02G150700 | 137785828 |  | 0.00  |                                                       |
| TraesCS3A02G150800 | 137787132 |  | -0.07 |                                                       |
| TraesCS3A02G150900 | 137912166 |  | -0.21 |                                                       |

|                    |           |  |       |                                                                   |
|--------------------|-----------|--|-------|-------------------------------------------------------------------|
| TraesCS3A02G151000 | 138284334 |  | 1.44  | probable membrane-associated kinase regulator 2                   |
| TraesCS3A02G151100 | 140003720 |  | -0.28 | peptidyl-prolyl cis-trans isomerase, chloroplastic                |
| TraesCS3A02G151200 | 140040910 |  | -0.33 |                                                                   |
| TraesCS3A02G151300 | 140050261 |  | -8.18 |                                                                   |
| TraesCS3A02G151400 | 140805091 |  | 0.00  |                                                                   |
| TraesCS3A02G151500 | 140956483 |  | 0.00  |                                                                   |
| TraesCS3A02G151600 | 141008416 |  | -0.12 |                                                                   |
| TraesCS3A02G151700 | 141041357 |  | -0.18 | U11/U12 small nuclear ribonucleoprotein 59 kDa protein isoform X2 |
| TraesCS3A02G151800 | 141910098 |  | 1.57  | transcription repressor OFP3-like                                 |
| TraesCS3A02G151900 | 142573563 |  | 0.04  |                                                                   |
| TraesCS3A02G152000 | 142579172 |  | -0.01 |                                                                   |
| TraesCS3A02G152100 | 142878674 |  | 1.33  |                                                                   |
| TraesCS3A02G152200 | 142890247 |  | 0.06  | PERK1                                                             |
| TraesCS3A02G152300 | 142896448 |  | -0.36 |                                                                   |
| TraesCS3A02G152500 | 142923164 |  | 0.98  |                                                                   |
| TraesCS3A02G152600 | 142976623 |  | 0.00  |                                                                   |
| TraesCS3A02G152700 | 143017324 |  | 1.25  | (+)-menthofuran synthase-like                                     |
| TraesCS3A02G152800 | 143470691 |  | 0.00  |                                                                   |
| TraesCS3A02G153000 | 143533072 |  | 0.86  |                                                                   |
| TraesCS3A02G153100 | 143541890 |  | -0.01 |                                                                   |
| TraesCS3A02G153200 | 144009541 |  | 0.00  |                                                                   |
| TraesCS3A02G153300 | 144149003 |  | 1.17  |                                                                   |
| TraesCS3A02G153400 | 144152212 |  | 1.30  | Glyoxylate reductase                                              |
| TraesCS3A02G153500 | 144154998 |  | 1.05  |                                                                   |
| TraesCS3A02G153600 | 144164850 |  | -0.07 |                                                                   |
| TraesCS3A02G153700 | 144433736 |  | -0.34 | Myb-related protein 3R-1                                          |
| TraesCS3A02G153800 | 144448392 |  | 0.00  |                                                                   |
| TraesCS3A02G153900 | 144542938 |  | -0.19 |                                                                   |
| TraesCS3A02G154000 | 145250370 |  | -0.15 |                                                                   |
| TraesCS3A02G154100 | 145557726 |  | 0.00  |                                                                   |
| TraesCS3A02G154200 | 145620582 |  | -0.08 | unknown                                                           |

|                    |           |  |       |                                                        |
|--------------------|-----------|--|-------|--------------------------------------------------------|
| TraesCS3A02G154300 | 145634971 |  | 0.00  |                                                        |
| TraesCS3A02G154400 | 145667222 |  | 0.74  | abscisic acid receptor PYL2                            |
| TraesCS3A02G154500 | 146386030 |  | 0.07  |                                                        |
| TraesCS3A02G154600 | 146394197 |  | -0.35 |                                                        |
| TraesCS3A02G154700 | 146559102 |  | -0.31 |                                                        |
| TraesCS3A02G154800 | 146562236 |  | 1.92  | thioesterase family protein                            |
| TraesCS3A02G154900 | 146601447 |  | 1.89  | putative E3 ubiquitin-protein ligase LIN               |
| TraesCS3A02G155000 | 146772726 |  | 3.75  | putative unclassified retrotransposon protein          |
| TraesCS3A02G155100 | 147283673 |  | -0.10 |                                                        |
| TraesCS3A02G155200 | 147789276 |  | -0.16 | IAA3                                                   |
| TraesCS3A02G155300 | 147812738 |  | 0.40  |                                                        |
| TraesCS3A02G155400 | 148603253 |  | -0.31 |                                                        |
| TraesCS3A02G155500 | 148615573 |  | 8.71  | VAN3-binding protein-like                              |
| TraesCS3A02G155600 | 148617573 |  | -0.16 |                                                        |
| TraesCS3A02G155700 | 149209877 |  | 0.00  |                                                        |
| TraesCS3A02G155800 | 149564155 |  | 1.52  | probable aquaporin TIP4-2                              |
| TraesCS3A02G155900 | 149715311 |  | 0.00  |                                                        |
| TraesCS3A02G156000 | 149985637 |  | 1.42  | protein JINGUBANG-like                                 |
| TraesCS3A02G156100 | 150711373 |  | -0.21 |                                                        |
| TraesCS3A02G156200 | 150718366 |  | -0.13 |                                                        |
| TraesCS3A02G156300 | 151314356 |  | -0.16 |                                                        |
| TraesCS3A02G156400 | 151322267 |  | 1.21  | unknown                                                |
| TraesCS3A02G156500 | 151642540 |  | -0.33 | ABI8                                                   |
| TraesCS3A02G156600 | 151675660 |  | -0.18 | unknown                                                |
| TraesCS3A02G156700 | 152000555 |  | 0.00  |                                                        |
| TraesCS3A02G156800 | 153076188 |  | 0.11  |                                                        |
| TraesCS3A02G156900 | 153362219 |  | -0.45 |                                                        |
| TraesCS3A02G157000 | 153594473 |  | -0.36 |                                                        |
| TraesCS3A02G157100 | 154029658 |  | -8.03 | serine/threonine-protein kinase RHS3-like (root hairs) |
| TraesCS3A02G157200 | 154032915 |  | 0.18  |                                                        |
| TraesCS3A02G157300 | 154072477 |  | -0.59 |                                                        |

|                    |           |  |       |                                                                |
|--------------------|-----------|--|-------|----------------------------------------------------------------|
| TraesCS3A02G157400 | 154383740 |  | 0.00  |                                                                |
| TraesCS3A02G157500 | 154658571 |  | -0.67 |                                                                |
| TraesCS3A02G157600 | 154741112 |  | -0.99 | unknown                                                        |
| TraesCS3A02G157700 | 155057280 |  | 0.00  |                                                                |
| TraesCS3A02G157800 | 155057280 |  | -0.15 |                                                                |
| TraesCS3A02G157900 | 155420436 |  | 0.00  | reticulon-like protein B21                                     |
| TraesCS3A02G158000 | 155429154 |  | -0.12 |                                                                |
| TraesCS3A02G158100 | 155825149 |  | -0.07 |                                                                |
| TraesCS3A02G158200 | 155826735 |  | -0.29 |                                                                |
| TraesCS3A02G158300 | 156124586 |  | -0.06 |                                                                |
| TraesCS3A02G158400 | 156230024 |  | -0.44 | WPP domain-interacting tail-anchored protein 1                 |
| TraesCS3A02G158500 | 156237883 |  | -0.48 |                                                                |
| TraesCS3A02G158600 | 156267711 |  | -0.10 |                                                                |
| TraesCS3A02G158700 | 157021716 |  | -0.19 |                                                                |
| TraesCS3A02G158800 | 157031841 |  | 0.89  | unknown                                                        |
| TraesCS3A02G158900 | 157043589 |  | 0.52  |                                                                |
| TraesCS3A02G159000 | 157347435 |  | 0.00  |                                                                |
| TraesCS3A02G159100 | 158170503 |  | -0.04 |                                                                |
| TraesCS3A02G159200 | 158467595 |  | -0.40 | ARF1                                                           |
| TraesCS3A02G159400 | 159345301 |  | -0.26 |                                                                |
| TraesCS3A02G159500 | 159347039 |  | -0.22 |                                                                |
| TraesCS3A02G159600 | 159422674 |  | -0.24 |                                                                |
| TraesCS3A02G159700 | 159431340 |  | 0.91  |                                                                |
| TraesCS3A02G159900 | 159835197 |  | -0.01 |                                                                |
| TraesCS3A02G160000 | 159995394 |  | 0.00  |                                                                |
| TraesCS3A02G160100 | 160016413 |  | 0.00  |                                                                |
| TraesCS3A02G160200 | 160074349 |  | 0.33  | COP9 signalosome complex subunit 6a [ <i>Triticum urartu</i> ] |
| TraesCS3A02G160300 | 160076442 |  | -0.18 |                                                                |
| TraesCS3A02G160400 | 160295461 |  | -8.72 | isoflavone reductase homolog                                   |
| TraesCS3A02G160500 | 160506568 |  | 1.56  | unknown                                                        |
| TraesCS3A02G160600 | 161443608 |  | -0.02 |                                                                |

|                    |           |  |       |                                                                                         |
|--------------------|-----------|--|-------|-----------------------------------------------------------------------------------------|
| TraesCS3A02G160700 | 161446234 |  | -0.89 |                                                                                         |
| TraesCS3A02G160800 | 161449857 |  | 13.54 | protein NUCLEAR FUSION DEFECTIVE 6, chloroplastic/mitochondrial-like isoform X1         |
| TraesCS3A02G160900 | 161451259 |  | -0.34 | DDB1- and CUL4-associated factor 13 [ <i>Aegilops tauschii</i> subsp. <i>tauschii</i> ] |
| TraesCS3A02G161000 | 161460235 |  | 0.49  |                                                                                         |
| TraesCS3A02G161100 | 162752691 |  | 0.00  |                                                                                         |
| TraesCS3A02G161200 | 162756053 |  | -0.11 |                                                                                         |
| TraesCS3A02G161300 | 162761485 |  | -0.33 | triose phosphate translocator [ <i>Triticum aestivum</i> ]                              |
| TraesCS3A02G161400 | 163621322 |  | 0.10  |                                                                                         |
| TraesCS3A02G161500 | 163693202 |  | 0.00  |                                                                                         |
| TraesCS3A02G161600 | 163792995 |  | 0.05  |                                                                                         |
| TraesCS3A02G161800 | 163929413 |  | -0.15 |                                                                                         |
| TraesCS3A02G161900 | 164369931 |  | -0.30 |                                                                                         |
| TraesCS3A02G162000 | 164403707 |  | -0.15 |                                                                                         |
| TraesCS3A02G162100 | 164419424 |  | 0.00  |                                                                                         |
| TraesCS3A02G162200 | 164610874 |  | -6.97 | unknown                                                                                 |
| TraesCS3A02G162300 | 164614843 |  | 0.00  |                                                                                         |
| TraesCS3A02G162400 | 164718651 |  | 0.00  |                                                                                         |
| TraesCS3A02G162500 | 164802465 |  | 0.00  |                                                                                         |
| TraesCS3A02G162600 | 164863015 |  | 0.00  |                                                                                         |
| TraesCS3A02G162700 | 164910707 |  | 0.00  |                                                                                         |
| TraesCS3A02G162800 | 164928880 |  | -1.49 | unknown                                                                                 |
| TraesCS3A02G162900 | 165087589 |  | 0.00  |                                                                                         |
| TraesCS3A02G163000 | 165320368 |  | 1.82  | unknown                                                                                 |
| TraesCS3A02G163100 | 165328563 |  | -0.24 |                                                                                         |
| TraesCS3A02G163200 | 165333707 |  | -0.05 | tRNA(His) guanylyltransferase 2-like                                                    |
| TraesCS3A02G163300 | 165415769 |  | -0.08 |                                                                                         |
| TraesCS3A02G163400 | 165843496 |  | 8.94  | unknown                                                                                 |
| TraesCS3A02G163500 | 166149246 |  | 0.00  |                                                                                         |
| TraesCS3A02G163700 | 166925104 |  | -0.31 |                                                                                         |
| TraesCS3A02G163900 | 168590929 |  | 0.12  |                                                                                         |
| TraesCS3A02G164100 | 168832726 |  | -0.46 |                                                                                         |

|                    |           |                   |       |                                                                            |
|--------------------|-----------|-------------------|-------|----------------------------------------------------------------------------|
| TraesCS3A02G164000 | 168833301 |                   | -0.02 |                                                                            |
| TraesCS3A02G164200 | 168837089 | <b>BS00021976</b> | -0.21 | shaggy-related protein kinase alpha [Brachypodium distachyon] = BS00021976 |
| TraesCS3A02G164300 | 169226560 |                   | 2.49  | MFS18 protein-like [Aegilops tauschii subsp. tauschii]                     |
| TraesCS3A02G164400 | 169290148 |                   | 0.00  |                                                                            |
| TraesCS3A02G164500 | 169839469 |                   | 5.86  | unknown                                                                    |
| TraesCS3A02G164600 | 169845024 |                   | -0.34 |                                                                            |
| TraesCS3A02G164700 | 169852539 |                   | -0.08 |                                                                            |
| TraesCS3A02G164800 | 170226838 |                   | 1.11  | unknown                                                                    |
| TraesCS3A02G164900 | 170233390 |                   | -0.42 |                                                                            |
| TraesCS3A02G165000 | 170244696 |                   | -0.17 |                                                                            |
| TraesCS3A02G165100 | 170383582 |                   | -0.27 |                                                                            |
| TraesCS3A02G165200 | 170388365 |                   | -0.27 |                                                                            |
| TraesCS3A02G165300 | 170390397 |                   | 0.00  |                                                                            |
| TraesCS3A02G165400 | 170485669 |                   | 0.79  | heavy metal-associated isoprenylated plant protein 43-like                 |
| TraesCS3A02G165500 | 170648445 |                   | 0.55  |                                                                            |
| TraesCS3A02G165600 | 170658582 |                   | 0.33  |                                                                            |
| TraesCS3A02G165700 | 170741455 |                   | 0.53  |                                                                            |
| TraesCS3A02G165800 | 170783633 |                   | 0.01  | unknown                                                                    |
| TraesCS3A02G165900 | 170811477 |                   | 1.89  | expansin EXPA5                                                             |
| TraesCS3A02G166002 | 170978175 |                   | -0.02 |                                                                            |
| TraesCS3A02G166000 | 170992733 |                   | 0.91  |                                                                            |
| TraesCS3A02G166100 | 171033857 |                   | 0.63  |                                                                            |
| TraesCS3A02G166200 | 171127374 |                   | 0.67  |                                                                            |
| TraesCS3A02G166300 | 171137518 |                   | 0.28  |                                                                            |
| TraesCS3A02G166400 | 171148800 |                   | -1.15 | signal recognition particle 14 kDa protein                                 |
| TraesCS3A02G166500 | 171173173 |                   | 0.39  |                                                                            |
| TraesCS3A02G166600 | 171174416 |                   | -0.14 | isocitrate dehydrogenase [NADP] isoform X2                                 |
| TraesCS3A02G166700 | 171209686 |                   | 0.00  |                                                                            |
| TraesCS3A02G166900 | 171255579 |                   | 0.89  |                                                                            |
| TraesCS3A02G167000 | 171548939 |                   | 6.94  | S-type anion channel SLAH1-like                                            |
| TraesCS3A02G167100 | 172629517 |                   | -0.20 | putative brassinosteroid receptor [Oryza sativa Japonica Group]            |



|                    |           |  |       |                                                              |
|--------------------|-----------|--|-------|--------------------------------------------------------------|
| TraesCS3A02G167200 | 172963326 |  | 1.00  | WRKY transcription factor 6                                  |
| TraesCS3A02G167300 | 173942316 |  | 0.00  |                                                              |
| TraesCS3A02G167400 | 173943797 |  | -0.21 |                                                              |
| TraesCS3A02G167700 | 174283442 |  | 0.04  | unknown                                                      |
| TraesCS3A02G167800 | 174292756 |  | 1.10  | unknown                                                      |
| TraesCS3A02G167900 | 174542475 |  | -0.67 | unknown                                                      |
| TraesCS3A02G168000 | 174768031 |  | 0.00  |                                                              |
| TraesCS3A02G168100 | 175237609 |  | -0.51 |                                                              |
| TraesCS3A02G168200 | 175632606 |  | -0.39 |                                                              |
| TraesCS3A02G168300 | 175808526 |  | 0.90  | unknown                                                      |
| TraesCS3A02G168400 | 175844695 |  | 0.00  |                                                              |
| TraesCS3A02G168500 | 175859332 |  | 0.33  |                                                              |
| TraesCS3A02G168600 | 175920771 |  | -0.65 |                                                              |
| TraesCS3A02G168800 | 176143399 |  | -0.29 |                                                              |
| TraesCS3A02G168900 | 176932023 |  | -0.14 |                                                              |
| TraesCS3A02G169000 | 176990481 |  | -7.97 | unknown                                                      |
| TraesCS3A02G169100 | 177086937 |  | 0.07  |                                                              |
| TraesCS3A02G169200 | 177104743 |  | -0.24 |                                                              |
| TraesCS3A02G169600 | 177702531 |  | 0.16  | probable L-type lectin-domain containing receptor kinase S.5 |
| TraesCS3A02G169800 | 177894086 |  | -0.88 |                                                              |
| TraesCS3A02G169900 | 178118523 |  | -0.09 |                                                              |
| TraesCS3A02G170000 | 178130748 |  | 0.06  |                                                              |
| TraesCS3A02G170100 | 178133754 |  | -0.07 |                                                              |
| TraesCS3A02G170200 | 178147889 |  | 0.00  |                                                              |
| TraesCS3A02G170300 | 178245198 |  | -0.14 |                                                              |
| TraesCS3A02G170400 | 178251802 |  | -0.11 |                                                              |
| TraesCS3A02G170500 | 178254443 |  | 0.00  |                                                              |
| TraesCS3A02G170600 | 178256071 |  | 0.01  |                                                              |
| TraesCS3A02G170700 | 178985803 |  | -7.74 | zinc finger protein NUTCRACKER-like                          |
| TraesCS3A02G170800 | 179534751 |  | 0.08  |                                                              |
| TraesCS3A02G170900 | 180743665 |  | 0.00  |                                                              |

|                    |           |  |       |                                                      |
|--------------------|-----------|--|-------|------------------------------------------------------|
| TraesCS3A02G171000 | 181087402 |  | 0.00  |                                                      |
| TraesCS3A02G171100 | 184214128 |  | 0.00  |                                                      |
| TraesCS3A02G171200 | 185166522 |  | 0.00  |                                                      |
| TraesCS3A02G171300 | 185173843 |  | 0.79  |                                                      |
| TraesCS3A02G171400 | 185177131 |  | -0.34 |                                                      |
| TraesCS3A02G171500 | 186040029 |  | 6.31  | ANXUR1 male factors controlling pollen tube behavior |
| TraesCS3A02G171600 | 186043009 |  | -0.27 |                                                      |
| TraesCS3A02G171800 | 186707977 |  | 0.00  |                                                      |
| TraesCS3A02G172000 | 186745878 |  | -0.15 |                                                      |
| TraesCS3A02G172100 | 186750246 |  | 1.77  | unknown                                              |
| TraesCS3A02G172200 | 186845109 |  | 0.74  |                                                      |
| TraesCS3A02G172300 | 187247733 |  | 1.33  | trinucleotide repeat-containing gene 18 protein-like |
| TraesCS3A02G172400 | 187250391 |  | -0.51 |                                                      |
| TraesCS3A02G172500 | 187255027 |  | 0.00  |                                                      |
| TraesCS3A02G172600 | 187305871 |  | 6.91  | unknown                                              |
| TraesCS3A02G172700 | 187432157 |  | 0.00  |                                                      |
| TraesCS3A02G172800 | 188101307 |  | 0.00  |                                                      |
| TraesCS3A02G172900 | 189275871 |  | -0.35 | GTP-binding protein SAR1A-like                       |
| TraesCS3A02G173000 | 189316375 |  | 0.11  |                                                      |
| TraesCS3A02G173100 | 191006045 |  | -8.02 |                                                      |
| TraesCS3A02G173200 | 191252409 |  | -0.34 | unknown                                              |
| TraesCS3A02G173300 | 191527521 |  | -0.19 | Topless                                              |
| TraesCS3A02G173400 | 191744853 |  | 0.00  |                                                      |
| TraesCS3A02G173500 | 191837340 |  | -0.77 |                                                      |
| TraesCS3A02G173600 | 191840265 |  | 0.41  |                                                      |
| TraesCS3A02G173700 | 191856550 |  | -0.38 |                                                      |
| TraesCS3A02G173800 | 191857329 |  | 0.00  |                                                      |
| TraesCS3A02G174000 | 191889546 |  | 0.00  |                                                      |
| TraesCS3A02G174100 | 192816217 |  | 1.60  | pectinesterase-like                                  |
| TraesCS3A02G174200 | 192849290 |  | 0.03  |                                                      |
| TraesCS3A02G174300 | 192853613 |  | -1.88 |                                                      |

|                    |           |  |       |                                                       |
|--------------------|-----------|--|-------|-------------------------------------------------------|
| TraesCS3A02G174400 | 192854503 |  | 0.13  |                                                       |
| TraesCS3A02G174500 | 193597951 |  | -0.17 |                                                       |
| TraesCS3A02G174600 | 193873752 |  | -0.22 |                                                       |
| TraesCS3A02G174700 | 193915579 |  | 0.00  |                                                       |
| TraesCS3A02G174800 | 194061628 |  | -0.10 |                                                       |
| TraesCS3A02G174900 | 194705893 |  | -0.38 | RNA-binding protein 25-like                           |
| TraesCS3A02G175000 | 194804163 |  | -0.22 |                                                       |
| TraesCS3A02G175100 | 195155807 |  | 0.00  |                                                       |
| TraesCS3A02G175200 | 195171635 |  | 0.15  |                                                       |
| TraesCS3A02G175300 | 195184518 |  | -0.82 | dynein light chain 1, cytoplasmic                     |
| TraesCS3A02G175400 | 195188996 |  | 0.12  |                                                       |
| TraesCS3A02G175500 | 195453879 |  | -0.25 |                                                       |
| TraesCS3A02G175600 | 195456777 |  | -0.18 |                                                       |
| TraesCS3A02G175700 | 195462866 |  | -0.04 | zinc finger CCCH domain-containing protein 4          |
| TraesCS3A02G175800 | 196180861 |  | -0.40 |                                                       |
| TraesCS3A02G175900 | 196195769 |  | -0.25 |                                                       |
| TraesCS3A02G176000 | 196419554 |  | 0.66  |                                                       |
| TraesCS3A02G176100 | 196761940 |  | 2.24  | flowering-promoting factor 1-like protein 1           |
| TraesCS3A02G176200 | 197092140 |  | 0.00  |                                                       |
| TraesCS3A02G176300 | 197428753 |  | -0.04 |                                                       |
| TraesCS3A02G176400 | 197433113 |  | -0.35 |                                                       |
| TraesCS3A02G176500 | 197849345 |  | -0.28 |                                                       |
| TraesCS3A02G176600 | 197860295 |  | -0.04 |                                                       |
| TraesCS3A02G176700 | 198034565 |  | -0.16 |                                                       |
| TraesCS3A02G176800 | 198181297 |  | -1.88 |                                                       |
| TraesCS3A02G176900 | 198489602 |  | -0.18 |                                                       |
| TraesCS3A02G177000 | 198836313 |  | 0.10  |                                                       |
| TraesCS3A02G177100 | 199145442 |  | -0.30 | pentatricopeptide repeat-containing protein At3g06920 |
| TraesCS3A02G177200 | 199412423 |  | 0.00  |                                                       |
| TraesCS3A02G177300 | 199688875 |  | -0.55 | CASPARIAN STRIP INTEGRITY FACTOR 1                    |
| TraesCS3A02G177400 | 199694319 |  | -0.26 |                                                       |

|                    |           |  |       |                                      |
|--------------------|-----------|--|-------|--------------------------------------|
| TraesCS3A02G177500 | 200810372 |  | -0.25 |                                      |
| TraesCS3A02G177600 | 201475006 |  | 1.52  | unknown                              |
| TraesCS3A02G177700 | 201498893 |  | -0.43 |                                      |
| TraesCS3A02G177800 | 201506461 |  | -0.36 |                                      |
| TraesCS3A02G177900 | 202584455 |  | 0.00  |                                      |
| TraesCS3A02G178000 | 202588435 |  | -0.15 |                                      |
| TraesCS3A02G178100 | 202634326 |  | -0.20 |                                      |
| TraesCS3A02G178200 | 202638266 |  | -0.29 |                                      |
| TraesCS3A02G178300 | 202826530 |  | 7.96  | putative cyclin-dependent kinase F-2 |
| TraesCS3A02G178400 | 202827156 |  | 0.33  |                                      |
| TraesCS3A02G178500 | 202984528 |  | 0.00  |                                      |
| TraesCS3A02G178600 | 203654393 |  | -0.35 | protein HOTHEAD-like                 |
| TraesCS3A02G178700 | 203983146 |  | -0.10 |                                      |
| TraesCS3A02G178800 | 204821537 |  | 0.26  |                                      |
| TraesCS3A02G178900 | 204865876 |  | -0.37 |                                      |
| TraesCS3A02G179000 | 204882919 |  | -0.05 |                                      |
| TraesCS3A02G179100 | 205689861 |  | -0.10 |                                      |
| TraesCS3A02G179200 | 206623114 |  | -0.09 |                                      |
| TraesCS3A02G179300 | 207241844 |  | 0.00  |                                      |
| TraesCS3A02G179400 | 207829763 |  | 0.25  |                                      |
| TraesCS3A02G179500 | 207842123 |  | 0.43  |                                      |
| TraesCS3A02G179600 | 207845330 |  | -0.25 |                                      |
| TraesCS3A02G179700 | 208031588 |  | -0.15 |                                      |
| TraesCS3A02G179800 | 208066482 |  | -0.56 |                                      |
| TraesCS3A02G179900 | 208080790 |  | 0.09  |                                      |
| TraesCS3A02G180000 | 208085351 |  | 1.45  |                                      |
| TraesCS3A02G180100 | 208088981 |  | 0.00  |                                      |
| TraesCS3A02G180200 | 208221170 |  | 1.06  |                                      |
| TraesCS3A02G180300 | 208234139 |  | 0.37  |                                      |
| TraesCS3A02G180400 | 208237786 |  | -0.64 |                                      |
| TraesCS3A02G180500 | 208241293 |  | -0.35 |                                      |

|                    |           |  |       |                                                          |
|--------------------|-----------|--|-------|----------------------------------------------------------|
| TraesCS3A02G180600 | 208246099 |  | -0.11 | cyclic dof factor (CDF) 2-like                           |
| TraesCS3A02G180700 | 208454984 |  | 2.27  | unknown                                                  |
| TraesCS3A02G180800 | 208637892 |  | -7.82 |                                                          |
| TraesCS3A02G180900 | 208724568 |  | -0.07 |                                                          |
| TraesCS3A02G181000 | 208735649 |  | 2.54  | PHYTOCHROME KINASE SUBSTRATE 4                           |
| TraesCS3A02G181100 | 208801195 |  | -0.13 |                                                          |
| TraesCS3A02G181200 | 209402146 |  | -0.11 |                                                          |
| TraesCS3A02G181300 | 209525298 |  | -2.58 |                                                          |
| TraesCS3A02G181400 | 209602410 |  | 2.09  | geranylgeranyl diphosphate reductase, chloroplastic-like |
| TraesCS3A02G181500 | 209653024 |  | -0.22 |                                                          |
| TraesCS3A02G181600 | 210092865 |  | -0.08 |                                                          |
| TraesCS3A02G181700 | 210125457 |  | 0.00  |                                                          |
| TraesCS3A02G181800 | 210246833 |  | -0.06 |                                                          |
| TraesCS3A02G181900 | 210258397 |  | -0.09 |                                                          |
| TraesCS3A02G182000 | 210932388 |  | -0.17 |                                                          |
| TraesCS3A02G182100 | 211188157 |  | 1.16  | E3 ubiquitin-protein ligase EL5-like                     |
| TraesCS3A02G182200 | 211503919 |  | -0.21 |                                                          |
| TraesCS3A02G182300 | 211952697 |  | 0.00  |                                                          |
| TraesCS3A02G182400 | 211953911 |  | 0.68  | unknown                                                  |
| TraesCS3A02G182500 | 211955321 |  | 0.01  |                                                          |
| TraesCS3A02G182600 | 212086482 |  | 0.57  |                                                          |
| TraesCS3A02G182700 | 212087787 |  | 0.06  |                                                          |
| TraesCS3A02G182800 | 212109352 |  | -0.19 |                                                          |
| TraesCS3A02G182900 | 212112431 |  | -0.12 |                                                          |
| TraesCS3A02G183100 | 212531004 |  | -0.05 |                                                          |
| TraesCS3A02G183200 | 212702120 |  | -0.03 |                                                          |
| TraesCS3A02G183300 | 212706091 |  | 0.00  |                                                          |
| TraesCS3A02G183400 | 212712042 |  | 0.00  |                                                          |
| TraesCS3A02G183500 | 212740793 |  | -0.05 |                                                          |
| TraesCS3A02G183600 | 212768626 |  | -0.35 |                                                          |
| TraesCS3A02G183700 | 213129151 |  | 0.01  |                                                          |

|                    |           |  |       |                                                        |
|--------------------|-----------|--|-------|--------------------------------------------------------|
| TraesCS3A02G183800 | 213256188 |  | 0.57  |                                                        |
| TraesCS3A02G183900 | 213735741 |  | 0.43  |                                                        |
| TraesCS3A02G184000 | 214116286 |  | -0.15 |                                                        |
| TraesCS3A02G184200 | 214287963 |  | -0.17 |                                                        |
| TraesCS3A02G184300 | 215202922 |  | 0.17  |                                                        |
| TraesCS3A02G184400 | 215471906 |  | 4.04  | serine/threonine-protein kinase-like protein At5g23170 |
| TraesCS3A02G184500 | 215478994 |  | -0.24 |                                                        |
| TraesCS3A02G184700 | 215485340 |  | -1.08 | probable peptide/nitrate transporter At3g43790 isoform |
| TraesCS3A02G184800 | 215950065 |  | -0.42 |                                                        |
| TraesCS3A02G184900 | 216133520 |  | 1.12  | Alpha-glucosidase yihQ                                 |
| TraesCS3A02G185000 | 216465668 |  | 3.14  | protein MIZU-KUSSEI 1-like                             |
| TraesCS3A02G185200 | 216937529 |  | 0.00  |                                                        |
| TraesCS3A02G185300 | 217713628 |  | 0.00  |                                                        |
| TraesCS3A02G185400 | 217817377 |  | -0.21 |                                                        |
| TraesCS3A02G185500 | 217820700 |  | -0.08 |                                                        |
| TraesCS3A02G185600 | 217958846 |  | 0.00  |                                                        |
| TraesCS3A02G185700 | 217981422 |  | -0.01 |                                                        |
| TraesCS3A02G185800 | 218117459 |  | 0.10  |                                                        |
| TraesCS3A02G185900 | 218728050 |  | 0.70  |                                                        |
| TraesCS3A02G186000 | 219725917 |  | 0.00  |                                                        |
| TraesCS3A02G186100 | 219793803 |  | 0.06  |                                                        |
| TraesCS3A02G186200 | 219797550 |  | -0.22 |                                                        |
| TraesCS3A02G186300 | 220016030 |  | 0.00  |                                                        |
| TraesCS3A02G186400 | 220886752 |  | -0.22 |                                                        |
| TraesCS3A02G186500 | 221277371 |  | -0.20 |                                                        |
| TraesCS3A02G186600 | 221667628 |  | 0.04  |                                                        |
| TraesCS3A02G186700 | 221923658 |  | 0.24  |                                                        |
| TraesCS3A02G186800 | 221927970 |  | 1.21  | unknown                                                |
| TraesCS3A02G186900 | 221930752 |  | 8.16  | Early nodulin-like protein 1                           |
| TraesCS3A02G187000 | 221946541 |  | 0.22  |                                                        |
| TraesCS3A02G187100 | 222042031 |  | -0.28 |                                                        |

|                    |           |  |       |                                       |
|--------------------|-----------|--|-------|---------------------------------------|
| TraesCS3A02G187200 | 222452133 |  | -0.23 |                                       |
| TraesCS3A02G187300 | 223521136 |  | -0.44 |                                       |
| TraesCS3A02G187400 | 223705484 |  | 0.98  |                                       |
| TraesCS3A02G187500 | 224363400 |  | -0.20 |                                       |
| TraesCS3A02G187600 | 224377624 |  | 0.11  |                                       |
| TraesCS3A02G187700 | 224969259 |  | 7.42  | unknown                               |
| TraesCS3A02G187800 | 225893370 |  | 2.21  | transcriptional activator Myb-like    |
| TraesCS3A02G187900 | 227364659 |  | -0.17 |                                       |
| TraesCS3A02G188000 | 227407930 |  | -0.04 |                                       |
| TraesCS3A02G188100 | 227632777 |  | 4.86  | apocytochrome b                       |
| TraesCS3A02G188200 | 227637631 |  | 0.00  |                                       |
| TraesCS3A02G188300 | 227645744 |  | 0.00  |                                       |
| TraesCS3A02G188400 | 227908994 |  | 1.03  |                                       |
| TraesCS3A02G188500 | 227921423 |  | -0.38 |                                       |
| TraesCS3A02G188600 | 229177381 |  | 0.00  |                                       |
| TraesCS3A02G188700 | 230091436 |  | -0.67 |                                       |
| TraesCS3A02G188800 | 230227535 |  | 0.35  |                                       |
| TraesCS3A02G188900 | 230999664 |  | -0.29 | Crossover junction endonuclease MUS81 |
| TraesCS3A02G189000 | 231014310 |  | -0.21 |                                       |
| TraesCS3A02G189100 | 231039843 |  | 0.41  |                                       |
| TraesCS3A02G189200 | 231669384 |  | 0.50  |                                       |
| TraesCS3A02G189300 | 231671439 |  | -0.08 |                                       |
| TraesCS3A02G189400 | 232268975 |  | -0.15 |                                       |
| TraesCS3A02G189500 | 233021585 |  | 0.60  |                                       |
| TraesCS3A02G189600 | 234210384 |  | -0.05 |                                       |
| TraesCS3A02G189700 | 234215443 |  | -0.37 |                                       |
| TraesCS3A02G189800 | 234940284 |  | 0.03  |                                       |
| TraesCS3A02G189900 | 235206120 |  | -0.13 |                                       |
| TraesCS3A02G190000 | 235234560 |  | -0.55 | unknown                               |
| TraesCS3A02G190100 | 235370853 |  | -0.19 |                                       |
| TraesCS3A02G190200 | 235381531 |  | 2.62  | calmodulin-binding protein 25-like    |

|                    |           |  |       |                                                  |
|--------------------|-----------|--|-------|--------------------------------------------------|
| TraesCS3A02G190300 | 235823604 |  | -0.26 |                                                  |
| TraesCS3A02G190400 | 237053956 |  | 0.00  |                                                  |
| TraesCS3A02G190700 | 238676584 |  | -0.08 |                                                  |
| TraesCS3A02G190800 | 239957053 |  | -0.20 |                                                  |
| TraesCS3A02G191000 | 240355868 |  | 0.40  |                                                  |
| TraesCS3A02G190900 | 240356072 |  | -7.05 |                                                  |
| TraesCS3A02G191100 | 241922344 |  | 0.40  |                                                  |
| TraesCS3A02G191200 | 241924020 |  | -0.26 |                                                  |
| TraesCS3A02G191300 | 243862105 |  | -0.54 |                                                  |
| TraesCS3A02G191400 | 243870533 |  | -0.23 |                                                  |
| TraesCS3A02G191500 | 243873796 |  | 1.65  | CO(2)-response secreted protease-like isoform X1 |
| TraesCS3A02G191600 | 244350805 |  | -6.76 |                                                  |
| TraesCS3A02G191700 | 244482474 |  | -0.66 |                                                  |
| TraesCS3A02G191800 | 245598680 |  | -0.28 |                                                  |
| TraesCS3A02G191900 | 246041212 |  | -0.31 |                                                  |
| TraesCS3A02G192000 | 247729247 |  | -0.03 |                                                  |
| TraesCS3A02G192100 | 248218357 |  | 0.09  |                                                  |
| TraesCS3A02G192200 | 248545758 |  | 0.12  |                                                  |
| TraesCS3A02G192300 | 249746082 |  | 0.00  |                                                  |
| TraesCS3A02G192400 | 249853150 |  | -0.17 |                                                  |
| TraesCS3A02G192500 | 251317981 |  | -0.37 |                                                  |
| TraesCS3A02G192600 | 256234246 |  | 0.01  |                                                  |
| TraesCS3A02G192700 | 256865246 |  | -0.19 |                                                  |
| TraesCS3A02G192800 | 259063611 |  | 0.00  |                                                  |
| TraesCS3A02G192900 | 259324185 |  | 0.07  |                                                  |
| TraesCS3A02G193000 | 259838202 |  | 0.00  |                                                  |
| TraesCS3A02G193100 | 260066304 |  | -0.05 |                                                  |
| TraesCS3A02G193200 | 261348337 |  | -0.20 |                                                  |
| TraesCS3A02G193400 | 262522275 |  | -0.21 |                                                  |
| TraesCS3A02G193500 | 264023366 |  | -0.13 |                                                  |
| TraesCS3A02G193600 | 265171852 |  | -0.18 |                                                  |



|                    |           |                   |       |                                                        |
|--------------------|-----------|-------------------|-------|--------------------------------------------------------|
| TraesCS3A02G193700 | 265537026 |                   | -0.33 |                                                        |
| TraesCS3A02G193800 | 266450899 |                   | -0.23 |                                                        |
| TraesCS3A02G193900 | 266687510 |                   | -0.17 |                                                        |
|                    | 266691232 | <b>BS00110129</b> |       |                                                        |
| TraesCS3A02G194000 | 267040216 |                   | -0.20 |                                                        |
| TraesCS3A02G194100 | 269203873 |                   | -0.46 |                                                        |
| TraesCS3A02G194200 | 269391598 |                   | -0.23 |                                                        |
| TraesCS3A02G194300 | 269648176 |                   | 0.03  |                                                        |
| TraesCS3A02G194500 | 271616977 |                   | 0.00  |                                                        |
| TraesCS3A02G194600 | 272769515 |                   | -0.38 |                                                        |
| TraesCS3A02G194700 | 273159694 |                   | -0.56 |                                                        |
| TraesCS3A02G194800 | 275274775 |                   | -0.79 | ubiquitin-like modifier-activating enzyme 5 isoform X3 |
| TraesCS3A02G194900 | 276474877 |                   | 0.09  |                                                        |
| TraesCS3A02G195100 | 277487239 |                   | 0.13  |                                                        |
| TraesCS3A02G195200 | 278734929 |                   | -0.04 |                                                        |
| TraesCS3A02G195300 | 279435212 |                   | -0.13 |                                                        |
| TraesCS3A02G195400 | 281183990 |                   | -0.02 |                                                        |
| TraesCS3A02G195500 | 283093819 |                   | 0.07  |                                                        |
| TraesCS3A02G195600 | 288535826 |                   | -0.18 |                                                        |
| TraesCS3A02G195700 | 290414357 |                   | -0.36 |                                                        |
| TraesCS3A02G195800 | 291784149 |                   | 0.00  |                                                        |
| TraesCS3A02G195900 | 291787652 |                   | -0.32 |                                                        |
| TraesCS3A02G196000 | 293060645 |                   | 0.00  |                                                        |
| TraesCS3A02G196100 | 293585683 |                   | 0.61  |                                                        |
| TraesCS3A02G196200 | 295947787 |                   | 0.70  |                                                        |
| TraesCS3A02G196300 | 296923209 |                   | -0.27 |                                                        |
| TraesCS3A02G196400 | 298146055 |                   | -0.23 |                                                        |
| TraesCS3A02G196500 | 298370388 |                   | 9.28  | unknown                                                |
| TraesCS3A02G196600 | 299554908 |                   | -0.08 |                                                        |
| TraesCS3A02G196700 | 301120494 |                   | -0.07 |                                                        |
| TraesCS3A02G196800 | 302928187 |                   | 0.99  |                                                        |

|                    |           |  |                   |       |
|--------------------|-----------|--|-------------------|-------|
| TraesCS3A02G196900 | 303529702 |  |                   | -0.35 |
| TraesCS3A02G197000 | 303829226 |  |                   | 0.12  |
| TraesCS3A02G197100 | 304889974 |  |                   | 0.00  |
| TraesCS3A02G197200 | 306859162 |  |                   | -0.05 |
| TraesCS3A02G197300 | 307913850 |  |                   | 0.03  |
| TraesCS3A02G197400 | 308674350 |  |                   | 0.00  |
| TraesCS3A02G197500 | 308675476 |  |                   | -0.01 |
| TraesCS3A02G197600 | 308701135 |  |                   | -0.17 |
| TraesCS3A02G197700 | 309337811 |  |                   | -0.24 |
| TraesCS3A02G197800 | 310690670 |  |                   | -0.22 |
|                    | 310746858 |  | <b>barc19</b>     |       |
|                    | 414814170 |  | <b>BS00022129</b> |       |
|                    | 414814542 |  | <b>BS00010947</b> |       |
|                    | 487458080 |  | <b>BS00003837</b> |       |
|                    | 514312171 |  | <b>BS00011170</b> |       |
|                    | 526865255 |  | <b>GA2ox3-1</b>   |       |
|                    | 562351788 |  | <b>BS00011612</b> |       |
|                    | 625789607 |  | <b>wmc264</b>     |       |
|                    | 642367061 |  | <b>BS00071428</b> |       |
|                    | 732472437 |  | <b>BS00029569</b> |       |

### Supplementary Table 1.

The full High Confidence gene content for the 265 Mb region covering the whole Ht and Hd QTL regions. This was obtained using BioMart at [https://plants.ensembl.org/Triticum\\_aestivum/Info/Index](https://plants.ensembl.org/Triticum_aestivum/Info/Index) The Gene ID and the Start position in the IWGSC RefSeq v1.0 are indicated.

Selected Mapping Markers used in the QTL mapping (KASP and SSR) and the QTL regions they define for the Ht and Hd QTLs are shown.

The expression level ratio between Avalon and Cadenza is indicated (log2FoldChange). Gene function is shown, if available.

## Supplementary Table 2

### A. Yield and yield component data from Church Farm 2015-16

| Lines   | mean GY | mean GPSQM | mean TGW | GY SEMs | GRPSQM SEMs |
|---------|---------|------------|----------|---------|-------------|
| 3A.72   | 9.382   | 18785      | 49.9     | 0.433   | 5421        |
| 3A.21   | 9.814   | 19634      | 49.9     | 0.093   | 5659        |
| 3A.24   | 10.203  | 20742      | 47.9     | 0.291   | 691         |
| 3A.26   | 9.197   | 18849      | 48.7     | 0.639   | 5457        |
| 3A.29   | 10.462  | 21127      | 49.5     | 0.231   | 634         |
| 3A.35   | 9.722   | 19598      | 49.6     | 1.013   | 5745        |
| 3A.56   | 10.290  | 21431      | 48.1     | 0.522   | 1388        |
| 3A.75   | 10.320  | 20755      | 49.7     | 0.438   | 1118        |
| NIL-A   | 9.524   | 19192      | 49.6     | 0.391   | 5545        |
| NIL-C   | 10.648  | 21264      | 50.1     | 0.533   | 1228        |
| Avalon  | 9.302   | 19239      | 48.3     | 0.570   | 5568        |
| Cadenza | 9.358   | 18694      | 49.9     | 0.526   | 703         |

**B. Single marker regression analysis for yield components from Church Farm 2015-16**

|                       | <i>Ht</i>  |            |            |            |            | <i>Hd</i>  |
|-----------------------|------------|------------|------------|------------|------------|------------|
| <b>bp</b>             | 61343069   | 61348484   |            | 81477543   | 106434896  | 168837814  |
| <b>Marker</b>         | BS00003801 | BS00022516 | BS00034344 | BS00022624 | BS00022148 | BS00021976 |
|                       |            |            |            |            |            |            |
| <b>GRYLD.pValue</b>   | 0.882      | 0.714      | 0.714      | 0.303      | 0.478      | 0.256      |
| <b>GRYLD.effect</b>   | 0.0137     | -0.0365    | -0.0365    | 0.107      | 0.0777     | 0.107      |
| <b>GRYLD.mean</b>     | 9.91       | 9.97       | 9.97       | 9.74       | 9.81       | 9.79       |
|                       |            |            |            |            |            |            |
| <b>TGRWT.pValue</b>   | 0.805      | 0.935      | 0.935      | 0.813      | 0.613      | 0.386      |
| <b>TGRWT.effectB</b>  | 0.0381     | -0.0142    | -0.0142    | -0.0496    | -0.105     | -0.145     |
| <b>TGRWT.mean</b>     | 49.3       | 49.4       | 49.4       | 49.5       | 49.6       | 49.6       |
|                       |            |            |            |            |            |            |
| <b>GRPSQM.pValue</b>  | 0.756      | 0.953      | 0.953      | 0.0689     | 0.177      | 0.0672     |
| <b>GRPSQM.effectB</b> | 73.2       | -15.8      | -15.8      | 492        | 394        | 409        |
| <b>GRPSQM.mean</b>    | 19900      | 20100      | 20100      | 19000      | 19300      | 19400      |

**Supplementary Table S2.** GY = Grain Yield (tonnes per hectare), GPSQM = grains per square metre, TGW= Thousand grain weight. SEM= standard error of the mean. Lines 3A.XX are recombinants at the 3A locus. NIL-A and NIL-C are the Cadenza Near Isogenic Lines carrying an Avalon and Cadenza introgression respectively and from which the recombinants are derived. Avalon and Cadenza are the parental varieties. bp refers to the position in the IWGSC RefSeq v1.0. Details of BS markers can be found at <https://www.cerealsdb.uk.net/cerealgenomics/CerealsDB/indexNEW.php>. *Ht* and *Hd* show peak QTL marker positions for height and heading.
